# Supplementary material for: Does cognitive behaviour therapy affect peripheral inflammation of depression? A protocol for the systematic review and meta-analysis
Source: PubMed Central journal article supplement — BMJ Open. 2021 Dec 2;11(12):e048162. doi: 10.1136/bmjopen-2020-048162 (PMC8640668; doi:10.1136/bmjopen-2020-048162), 2021-12-02
Supplement: bmjopen-2020-048162.draft_revisions.pdf [file bmjopen-2020-048162.draft_revisions.pdf]

# BMJ Open

BMJ Open is committed to open peer review. As part of this commitment we make the peer review history of every article we publish publicly available.

When an article is published we post the peer reviewers' comments and the authors' responses online. We also post the versions of the paper that were used during peer review. These are the versions that the peer review comments apply to.

The versions of the paper that follow are the versions that were submitted during the peer review process. They are not the versions of record or the final published versions. They should not be cited or distributed as the published version of this manuscript.

BMJ Open is an open access journal and the full, final, typeset and author-corrected version of record of the manuscript is available on our site with no access controls, subscription charges or pay-per-view fees (<http://bmjopen.bmj.com>).

If you have any questions on BMJ Open's open peer review process please email [info.bmjopen@bmj.com](mailto:info.bmjopen@bmj.com)

# BMJ Open

## Does Cognitive Behavior Therapy Affect Inflammation of Depression? A Protocol for the Systematic Review and Meta-analysis

|                               |                                                                                                                                                                                                                                                                                            |
|-------------------------------|--------------------------------------------------------------------------------------------------------------------------------------------------------------------------------------------------------------------------------------------------------------------------------------------|
| Journal:                      | <i>BMJ Open</i>                                                                                                                                                                                                                                                                            |
| Manuscript ID                 | bmjopen-2020-048162                                                                                                                                                                                                                                                                        |
| Article Type:                 | Protocol                                                                                                                                                                                                                                                                                   |
| Date Submitted by the Author: | 24-Dec-2020                                                                                                                                                                                                                                                                                |
| Complete List of Authors:     | Cao, Bing; Southwest University,<br>Li, Ruonan; Southwest University<br>Ding, Ling; Jiangjin Central Hospital of Chongqing, Pharmacy Department<br>Xu, Jiatong; Southwest University<br>Ma, Haijing; Southwest University<br>Liu, Jie; Jiangjin Hospital of Chongqing, Pharmacy Department |
| Keywords:                     | Depression & mood disorders < PSYCHIATRY, CLINICAL PHYSIOLOGY, IMMUNOLOGY, MENTAL HEALTH                                                                                                                                                                                                   |
|                               |                                                                                                                                                                                                                                                                                            |

SCHOLARONE™  
Manuscripts

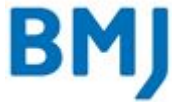

I, the Submitting Author has the right to grant and does grant on behalf of all authors of the Work (as defined in the below author licence), an exclusive licence and/or a non-exclusive licence for contributions from authors who are: i) UK Crown employees; ii) where BMJ has agreed a CC-BY licence shall apply, and/or iii) in accordance with the terms applicable for US Federal Government officers or employees acting as part of their official duties; on a worldwide, perpetual, irrevocable, royalty-free basis to BMJ Publishing Group Ltd ("BMJ") its licensees and where the relevant Journal is co-owned by BMJ to the co-owners of the Journal, to publish the Work in this journal and any other BMJ products and to exploit all rights, as set out in our [licence](#).

The Submitting Author accepts and understands that any supply made under these terms is made by BMJ to the Submitting Author unless you are acting as an employee on behalf of your employer or a postgraduate student of an affiliated institution which is paying any applicable article publishing charge ("APC") for Open Access articles. Where the Submitting Author wishes to make the Work available on an Open Access basis (and intends to pay the relevant APC), the terms of reuse of such Open Access shall be governed by a Creative Commons licence – details of these licences and which [Creative Commons](#) licence will apply to this Work are set out in our licence referred to above.

Other than as permitted in any relevant BMJ Author's Self Archiving Policies, I confirm this Work has not been accepted for publication elsewhere, is not being considered for publication elsewhere and does not duplicate material already published. I confirm all authors consent to publication of this Work and authorise the granting of this licence.

1  
2  
3 **1 Does Cognitive Behavior Therapy Affect Inflammation of Depression? A Protocol for**  
4 **the Systematic Review and Meta-analysis.**  
5  
6

7  
8  
9 3 Bing Cao <sup>1</sup>, Ruonan Li <sup>1</sup>, Ling Ding<sup>2</sup>, Jiatong Xu <sup>1</sup>, Haijing Ma <sup>1</sup>, Jie Liu<sup>2,\*</sup>

10  
11 4 <sup>1</sup> Key Laboratory of Cognition and Personality, Faculty of Psychology, Ministry of  
12 Education, Southwest University, Chongqing, 400715, P. R. China  
13

14  
15 6 <sup>2</sup> Pharmacy Department, Jiangjin Central Hospital of Chongqing, Chongqing, 402260, P.R.  
16 China  
17  
18  
19  
20

21  
22  
23 9 **Corresponding author**

24  
25 10 Jie Liu, Msc, Pharmacy Department, Jiangjin Central Hospital of Chongqing, 725  
26 Jiangzhou Avenue, Dingshan, Chongqing 402260, P.R. China. Tel: +86-15215051510,  
27  
28 11 Email: lj453039683@163.com  
29  
30  
31

32  
33  
34 14 **Word count**

35  
36  
37 15 **Abstract:** 240 words; **Text:** 1518words; **Figures:** 1; **Tables:** 1.  
38  
39  
40  
41  
42  
43  
44  
45  
46  
47  
48  
49  
50  
51  
52  
53  
54  
55  
56  
57  
58  
59  
60

1  
2  
3     16   **Abstract**  
4  
5

6     17   **Introduction:** Cognitive behavior therapy (CBT) is becoming the most commonly  
7  
8     18   implemented and standard treatment for depression. Up to date, only a few number of  
9  
10    19   studies have investigated the potentially anti-inflammatory effects of CBT for depression  
11  
12    20   and results are inconsistent between studies. The current study aims to provide a  
13  
14    21   comprehensive, systematic review of the treatment effects of CBT on inflammation of  
15  
16    22   individuals with depression, and clarify the alterations of inflammatory cytokines pre- and  
17  
18    23   post- CBT treatment by meta-analysis.  
19  
20  
21  
22

23    24   **Methods and analysis:** This study will be conducted in accordance with the *Preferred*  
24  
25    25   *Reporting Items for Systematic Reviews and Meta-Analyses* (PRISMA) guidelines.  
26  
27    26   Electronic databases (CENTRAL, MEDLINE, Web of Science, and PsycINFO) will be  
28  
29    27   searched systematically using predetermined terms. Database searches will be  
30  
31    28   supplemented by expert contact, reference and citation checking, and grey literature.  
32  
33    29   Primary outcomes of interest will be validated measures of levels of inflammatory  
34  
35    30   cytokines pre- and post- CBT treatment in individuals with depression. Hedges' g will be  
36  
37    31   used to express the effect size (ES).  
38  
39  
40  
41

42    32   **Systematic review registration:** The protocol of current meta-analysis has been registered  
43  
44    33   at the Open Science Framework [<https://doi.org/10.17605/osf.io/tr9yh>].  
45  
46

47    34   **Ethics and Dissemination:** Formal ethical approval is not required by the National Ethical  
48  
49    35   Review Board in China as primary data will not be collected. The results alterations of  
50  
51    36   inflammatory cytokines pre- and post- CBT treatment in individuals with depression will  
52  
53  
54  
55  
56  
57  
58  
59  
60

1  
2  
3 37 be disseminated through a peer-reviewed publication and inform the most up-to-date  
4  
5 38 evidence of the roles of CBT treatment for depression.  
6  
7  
8  
9

10  
11 40 **Keywords:** Depression; Cognitive Behavior Therapy; Inflammation; Cytokines; C-  
12  
13 41 reactive protein  
14  
15

### 16 42

#### 17 43 **Article Summary**

#### 18 44 *Strengths and limitations of this study*

- 19 45 • This will be the first meta-analysis exploring the treatment effects of CBT on  
20 46 inflammation of individuals with depression.
- 21 47 • The results could provide the most up-to-date evidence to assist in shared decision  
22 48 making between patients, caregivers, and clinicians in treating the individuals with  
23 49 depression by using CBT.
- 24 50 • An insufficient amount of original researches is a possible limitation.
- 25 51 • Potential high heterogeneity may cause selection bias and also decrease the reliability  
26 52 of our results.  
27  
28  
29  
30  
31  
32  
33  
34  
35  
36  
37  
38  
39  
40  
41  
42  
43  
44  
45  
46  
47  
48  
49  
50  
51  
52  
53

## 54 **Introduction**

55 Depression is a severe and the most prevalent form of mental illness that characterized by  
56 neurocognitive deficits and disability <sup>1</sup>. The disorder manifests in millions of individuals  
57 worldwide, and a global health priority. The exploration of underlying mechanisms of  
58 depression are increasing over the past decades, none of them could clearly clarify the  
59 potential triggers of depression <sup>2</sup>. In recent years, the inflammation processes are  
60 recognized to be important contributors to depression <sup>3</sup>, the potential bidirectional  
61 relationship of depression and inflammation were also clarified <sup>4</sup>. Evidence from pre-  
62 clinical and clinical researches reached a consistency that the concentrations of pro-  
63 inflammatory cytokines are significantly increases in individuals or animal models of  
64 depression <sup>5</sup>. The cytokines, considered as molecular signals of sickness, mediated  
65 inflammation and decreased neurogenesis in depression <sup>6</sup>. Previous meta-analyses pointed  
66 out that pharmacological interventions could affect the levels of cytokines, for instance,  
67 Interleukin (IL)-6, C-reactive protein (CRP) <sup>7 8</sup>. Consistent with these findings, anti-  
68 inflammatory agents, such as non-steroidal anti-inflammatory drugs, statins and  
69 minocyclines, has been pointed out can improved antidepressant treatment effects <sup>9 10</sup>.

70 Cognitive behavior therapy (CBT) is becoming the most commonly implemented and  
71 standard treatment for depression <sup>11</sup>. Briefly, CBT is a psychological intervention based on  
72 effecting behavioral changes through cognitive aspects. The individuals develop strategies  
73 for managing and preventing depressive symptoms by monitoring mood symptoms and  
74 utilizing a repertoire of coping skills to manage stress in CBT <sup>12</sup>. A meta-analysis found  
75 that there is no difference in treatment effects of CBT and second generation  
76 antidepressants, either alone or in combination<sup>13</sup>. Recent published literatures illustrated

1  
2  
3 77 that similar with antidepressant treatment, CBT may also contribute to reduction of chronic  
4  
5 78 low-grade peripheral inflammation. However, the underlying biological processes of the  
6  
7  
8 79 CBT effects on depression are still very limited.  
9

10  
11 80 Up to date, only a few number of studies have investigated the potentially anti-  
12  
13 81 inflammatory effects of CBT for depression and results are inconsistent between studies  
14  
15 82 and the results were inconsistent. For example, some researches pointed out that IL-6 was  
16  
17 83 decreased after CBT, while no significant changes were founded in other studies <sup>14</sup>.  
18  
19 84 Additionally, whether the alterations of inflammatory cytokines associated with  
20  
21 85 improvements in depression after CBT treatment is also not well established. So far it is  
22  
23 86 worthy to conduct a systematic review and meta-analysis to summarize the most updated  
24  
25 87 research results for the role of CBT treatment in inflammation of depression.  
26  
27  
28  
29

30 88

## 31 32 33 89 **Aims and Objectives**

34  
35  
36 90 The current study aims to provide a comprehensive, systematic review of the treatment  
37  
38 91 effects of CBT on inflammation of individuals with depression, and clarify the alterations  
39  
40 92 of inflammatory cytokines pre- and post- CBT treatment by meta-analysis. From the  
41  
42 93 previous evidence, we hypothesized that some inflammatory cytokines, such as CRP, IL-  
43  
44 94 6, TNF- $\alpha$ , may decrease after the CBT intervention.  
45  
46  
47

48 95

## 49 50 51 96 **Methods**

52  
53  
54 97 *Search Strategy*  
55  
56  
57



1  
2  
3 98 The systematic review and meta-analysis will be conducted and reported in accordance  
4  
5 99 with the *Preferred Reporting Items for Systematic Reviews and Meta-Analyses (PRISMA)*  
6  
7  
8 100 statement<sup>15</sup>. **Figure 1** summarizes the study selection as a PRISMA flowchart. Electronic  
9  
10 101 databases (CENTRAL, MEDLINE, EMBASE, and PsycINFO) will be searched  
11  
12 102 systematically using predetermined terms. The keywords of our search strategy will be the  
13  
14  
15 103 key terms mapped to subject headings for (i) depression (major depressive disorder,  
16  
17 104 depression, mood disorder, dysthymic disorder); (ii) CBT (psychotherapy, cognitive  
18  
19 105 therapy, cognitive behavioral therapy); (iii) inflammatory cytokines (cytokine, interleukin,  
20  
21 106 chemokine, interferons, tumor necrosis factor, as well as the specific inflammatory  
22  
23  
24 107 biomarkers). The search strategy of PubMed is shown in **Table 1**.

#### 25 26 27 108 *Selection Criteria*

28  
29 109 The studies conducted the within-group comparisons of the peripheral levels of  
30  
31 110 cytokines and chemokines in participants with depression at baseline and after CBT will  
32  
33  
34 111 be included in the current meta-analysis. Study eligibility for the inclusion will be assessed  
35  
36 112 by the approach of Population, Intervention, Comparison, Outcome and Study Design  
37  
38  
39 113 (PICOS). Population: adult subjects ( $\geq 18$  years old) meeting the major depression  
40  
41 114 diagnoses by the Diagnostic and Statistical Manual of Mental Disorders (DSM; no  
42  
43 115 restrictions on editions) or International Classification of Diseases and Related Health  
44  
45 116 Problems (ICD) criteria; Intervention and Comparison: assessed the results of  
46  
47 117 inflammatory cytokines (e.g., IL-6, CRP or IL-10) before and after CBT. Outcome:  
48  
49 118 reported mean or median resting levels of inflammatory cytokines in saliva, blood, or urine  
50  
51  
52 119 was reported before and at least once after starting CBT, or the effect size could be  
53  
54  
55 120 calculated from the reported results. Study Design: random controlled trial (RCT), open-

1  
2  
3 121 label study, or longitudinal study with pre-test-post-test design. Exclusion criteria of the  
4  
5 122 studies will meet if they (1) did not focus on evaluating inflammatory cytokines levels on  
6  
7 123 depression; (2) only reported stimulated levels of cytokines; (3) were repetitive  
8  
9 124 publications from the same datasets by the same or different authors.

### 125 *Outcome Measures and Data Extraction*

126 The outcome for this meta-analysis will be the changes of inflammatory cytokines pre-  
127 and post- CBT treatment in individuals with depression, as measured by the standard mean  
128 differences (SMDs) their concentrations. Paired investigators (Jiatong Xu and Haijing Ma)  
129 will independently select the studies, reviewed the main reports and supplementary  
130 materials, extracted the relevant information. All reference lists of the retrieved articles  
131 will be reviewed to identify the potential studies. The following information will be  
132 extracted from each study: first author, publication year, study design, country, geographic  
133 location, age, sex, intervention, duration of intervention, inflammatory biomarkers  
134 measured, type of sample specimen required for test, sample detection method, sample size,  
135 the mean levels of subjects' inflammatory cytokines and standard deviations (SDs) before  
136 and after CBT treatment.

### 137 *Statistical analysis*

138 Only the inflammatory cytokines with sufficient numbers of studies ( $\geq 3$ ) will be  
139 performed the meta-analysis. Analyses will be performed for pre- and post-treatment of  
140 CBT. The main analysis will be conducted with a random effects model. Forest plots will  
141 be used to estimate the alteration of the levels of inflammatory cytokines pre- and post-  
142 treatment CBT, which will be evaluated by SMD with a 95% confidence interval (CI). The  
143 effect size (ES) are expressed as Hedges' g in order to adjusted for a potential bias wo

1  
2  
3 144 overestimate the effect size in small samples. According to the statistical power analysis  
4  
5 145 for the behavioral sciences (2nd edition), the ES is judged using the values of 0.2, 0.5, and  
6  
7 146 0.8 for small, medium and large (Cohen, 1988). The heterogeneity across the studies will  
8  
9  
10 147 be evaluated by chi-square statistics and I-Squared ( $I^2$ ) test. A value of  $P < 0.10$  or  $I^2 > 50\%$   
11  
12 148 indicated that the heterogeneity of effect estimates within each group of studies was  
13  
14  
15 149 statistically significant<sup>16</sup>, which shows that the percentage of the variability in effect  
16  
17 150 estimates owes to heterogeneity rather than chance. Furtherly, the subgroup analysis and  
18  
19 151 meta-regression will also be performed to investigate the source of the heterogeneity, and  
20  
21 152 the potential influence of included characteristics of the studies on the pooled effect size.  
22  
23  
24 153 Sensitivity analysis was performed to strengthen the results and investigate whether any  
25  
26 154 single study would have an effect on the heterogeneity of total measurements in each meta-  
27  
28 155 analysis. Additionally, the positive and negative results may not be equally likely to get  
29  
30  
31 156 published, thus the funnel plot with Begg's test and Egger's test will be used for testing the  
32  
33 157 publication bias. If publication bias will be found, then the trim and fill method would be  
34  
35 158 used to both identify and correct the asymmetry of funnel plot. All two-tailed  $p$ -values  $<$   
36  
37 159 0.05 will be defined as statistical significance. All the data analyses will be conducted using  
38  
39  
40 160 Stata (version 15.0, Stata Corp LP, College Station, TX, USA).

#### 41 42 43 161 *Patient and public involvement*

44  
45  
46 162 Patients were not involved in the development of this systematic review protocol. The  
47  
48 163 data for this systematic review will be collected from previously published studies.

#### 49 50 51 164 *Ethics and Dissemination*

52  
53  
54 165 Formal ethical approval is not required as primary data will not be collected with the  
55  
56 166 systematic review and meta-analysis. Data from previously published studies will be

1  
2  
3 167 retrieved and analyzed. This study including protocol development will run from October  
4  
5 168 2020 to October 2021. The results will be disseminated through a peer-reviewed  
6  
7 169 publication and inform the most up-to-date evidence of the roles of CBT treatment for  
8  
9 170 depression.

10  
11  
12  
13 171

## 14 15 16 172 **Discussion**

### 17 18 19 173 *Presentation of results and reporting*

20  
21 174 Our current systematic review and meta-analysis will provide a comprehensive  
22  
23 175 evidence for the treatment effects of CBT on inflammation of individuals with depression.  
24  
25 176 We will use the PRISMA guidelines and checklist in the publication process. The  
26  
27 177 quantitative data will be summarized and presented in tables, forest plots, and charts. The  
28  
29 178 alterations of inflammatory cytokines pre- and post- CBT treatment in individuals with  
30  
31 179 depression will be presented.

### 32 33 34 35 36 180 *Potential resources of limitations*

37  
38 181 The current study is anticipated to have some limitations. Firstly, we might not find a  
39  
40 182 sufficient amount of original researches to perform the analyses. Secondly, the potential  
41  
42 183 high heterogeneity between studies in the exposure of interest and restriction to studies in  
43  
44 184 English language, which will lead to selection bias and also decrease the reliability of our  
45  
46 185 results.

47  
48  
49  
50 186 To the best of our knowledge, this will be the first meta-analysis exploring the  
51  
52 187 treatment effects of CBT on inflammation of individuals with depression. From our  
53  
54 188 findings herein, we can provide the most up-to-date evidence to assist in shared decision  
55  
56  
57

189 making between patients, caregivers, and clinicians in treating the individuals with  
190 depression by using CBT and provide a foundation for future studies in this area.

191

### 192 **Author contributors**

193 Cao B, Xu JT and Ma HJ conceived the study and developed the search strategy. Cao  
194 B drafted the protocol and tested the search strategies in consultation with a librarian. Li  
195 RN and Yang FH provided advice on the protocol. All authors critically revised the  
196 protocol for methodological and intellectual content and have read and approved the final  
197 manuscript.

### 198 **Funding**

199 This research work is supported by funding from Southwest University (SWU019039),  
200 which funds Cao B. The funding bodies had no part in either the study design, conduct,  
201 analysis or interpretation of this study.

### 202 **Competing interests**

203 None declared.

### 204 **Patient consent for publication**

205 Not required.

### 206 **Data statement**

207 No applicable.

208 **References**

- 209 1. Ang YS, Frontero N, Belleau E, et al. Disentangling vulnerability, state and trait features of  
210 neurocognitive impairments in depression. *Brain* 2020 doi: 10.1093/brain/awaa314  
211 [published Online First: 2020/11/12]
- 212 2. McIntosh AM, Hall LS, Zeng Y, et al. Genetic and Environmental Risk for Chronic Pain and the  
213 Contribution of Risk Variants for Major Depressive Disorder: A Family-Based Mixed-  
214 Model Analysis. *PLoS Med* 2016;13(8):e1002090. doi: 10.1371/journal.pmed.1002090  
215 [published Online First: 2016/08/17]
- 216 3. Osimo EF, Baxter LJ, Lewis G, et al. Prevalence of low-grade inflammation in depression: a  
217 systematic review and meta-analysis of CRP levels. *Psychological medicine*  
218 2019;49(12):1958-70. doi: 10.1017/S0033291719001454 [published Online First:  
219 2019/07/02]
- 220 4. Beurel E, Toups M, Nemeroff CB. The Bidirectional Relationship of Depression and  
221 Inflammation: Double Trouble. *Neuron* 2020;107(2):234-56. doi:  
222 10.1016/j.neuron.2020.06.002 [published Online First: 2020/06/20]
- 223 5. Kim YK, Na KS, Myint AM, et al. The role of pro-inflammatory cytokines in neuroinflammation,  
224 neurogenesis and the neuroendocrine system in major depression. *Progress in neuro-  
225 psychopharmacology & biological psychiatry* 2016;64:277-84. doi:  
226 10.1016/j.pnpbp.2015.06.008 [published Online First: 2015/06/27]
- 227 6. Song C, Wang H. Cytokines mediated inflammation and decreased neurogenesis in animal  
228 models of depression. *Progress in neuro-psychopharmacology & biological psychiatry*  
229 2011;35(3):760-8. doi: 10.1016/j.pnpbp.2010.06.020 [published Online First: 2010/07/06]
- 230 7. Kohler CA, Freitas TH, Stubbs B, et al. Peripheral Alterations in Cytokine and Chemokine  
231 Levels After Antidepressant Drug Treatment for Major Depressive Disorder: Systematic  
232 Review and Meta-Analysis. *Molecular neurobiology* 2018;55(5):4195-206. doi:  
233 10.1007/s12035-017-0632-1 [published Online First: 2017/06/15]
- 234 8. Wiedlocha M, Marcinowicz P, Krupa R, et al. Effect of antidepressant treatment on peripheral  
235 inflammation markers - A meta-analysis. *Progress in neuro-psychopharmacology &  
236 biological psychiatry* 2018;80(Pt C):217-26. doi: 10.1016/j.pnpbp.2017.04.026 [published  
237 Online First: 2017/04/27]
- 238 9. Kohler-Forsberg O, C NL, Hjorthoj C, et al. Efficacy of anti-inflammatory treatment on major  
239 depressive disorder or depressive symptoms: meta-analysis of clinical trials. *Acta  
240 psychiatrica Scandinavica* 2019;139(5):404-19. doi: 10.1111/acps.13016 [published  
241 Online First: 2019/03/06]
- 242 10. Husain MI, Strawbridge R, Stokes PR, et al. Anti-inflammatory treatments for mood disorders:  
243 Systematic review and meta-analysis. *Journal of psychopharmacology (Oxford, England)*  
244 2017;31(9):1137-48. doi: 10.1177/0269881117725711 [published Online First:  
245 2017/09/01]
- 246 11. Lopez MA, Basco MA. Effectiveness of cognitive behavioral therapy in public mental health:  
247 comparison to treatment as usual for treatment-resistant depression. *Adm Policy Ment  
248 Health* 2015;42(1):87-98. doi: 10.1007/s10488-014-0546-4 [published Online First:  
249 2014/04/03]
- 250 12. Pearlstein JG, Staudenmaier PJ, West AE, et al. Immune response to stress induction as a  
251 predictor of cognitive-behavioral therapy outcomes in adolescent mood disorders: A pilot  
252 study. *J Psychiatr Res* 2020;120:56-63. doi: 10.1016/j.jpsychires.2019.10.012 [published  
253 Online First: 2019/10/22]
- 254 13. Amick HR, Gartlehner G, Gaynes BN, et al. Comparative benefits and harms of second  
255 generation antidepressants and cognitive behavioral therapies in initial treatment of major

- 1  
2  
3 256 depressive disorder: systematic review and meta-analysis. *BMJ* 2015;351:h6019. doi:  
4 257 10.1136/bmj.h6019 [published Online First: 2015/12/10]  
5 258 14. Felger JC, Lotrich FE. Inflammatory cytokines in depression: neurobiological mechanisms and  
6 259 therapeutic implications. *Neuroscience* 2013;246:199-229. doi:  
7 260 10.1016/j.neuroscience.2013.04.060 [published Online First: 2013/05/07]  
8 261 15. Moher D, Liberati A, Tetzlaff J, et al. Preferred reporting items for systematic reviews and  
9 262 meta-analyses: the PRISMA statement. *PLoS Med* 2009;6(7):e1000097. doi:  
10 263 10.1371/journal.pmed.1000097  
11 264 16. Cao B, Wang DF, Xu MY, et al. Lower folate levels in schizophrenia: A meta-analysis.  
12 265 *Psychiatry Res* 2016;245:1-7. doi: 10.1016/j.psychres.2016.03.003

14  
15 266  
16  
17  
18  
19  
20  
21  
22  
23  
24  
25  
26  
27  
28  
29  
30  
31  
32  
33  
34  
35  
36  
37  
38  
39  
40  
41  
42  
43  
44  
45  
46  
47  
48  
49  
50  
51  
52  
53  
54  
55  
56  
57  
58  
59  
60

For peer review only

1  
2  
3 268 **Figure Legend**  
4  
5

6 269 **Figure 1.** PRISMA flow diagram of study selection process.  
7  
8

9 270  
10  
11  
12  
13  
14  
15  
16  
17  
18  
19  
20  
21  
22  
23  
24  
25  
26  
27  
28  
29  
30  
31  
32  
33  
34  
35  
36  
37  
38  
39  
40  
41  
42  
43  
44  
45  
46  
47  
48  
49  
50  
51  
52  
53  
54  
55  
56  
57  
58  
59  
60

For peer review only



271

272

**Table 1. Search strategy for PubMed**

| Search number | Query                                                                                                                                                                                                                                                                                                                                                                                                                                                                                                                                                                                                                                                                                                                                                                                                                                                                                                                                                                                                                                                                                                                                                                                                     |
|---------------|-----------------------------------------------------------------------------------------------------------------------------------------------------------------------------------------------------------------------------------------------------------------------------------------------------------------------------------------------------------------------------------------------------------------------------------------------------------------------------------------------------------------------------------------------------------------------------------------------------------------------------------------------------------------------------------------------------------------------------------------------------------------------------------------------------------------------------------------------------------------------------------------------------------------------------------------------------------------------------------------------------------------------------------------------------------------------------------------------------------------------------------------------------------------------------------------------------------|
| #1            | "major depression"[Title/Abstract] OR "major depressive disorder"[Title/Abstract] OR "depressive symptom*"[Title/Abstract] OR "symptom, depressive"[Title/Abstract] OR "depress*"[Title/Abstract] OR "dysphor*"[Title/Abstract] OR "dysthym*"[Title/Abstract] OR "adjustment disorder*"[Title/Abstract] OR "mood disorder*"[Title/Abstract] OR "affective disorder"[Title/Abstract] OR "affective disorders"[Title/Abstract] OR "emotional depression*"[Title/Abstract]                                                                                                                                                                                                                                                                                                                                                                                                                                                                                                                                                                                                                                                                                                                                   |
| #2            | "Depression"[Mesh] OR "Depressive Disorder"[Mesh] OR "Depressive Disorder, Treatment-Resistant"[Mesh] OR "Depressive Disorder, Major"[Mesh]                                                                                                                                                                                                                                                                                                                                                                                                                                                                                                                                                                                                                                                                                                                                                                                                                                                                                                                                                                                                                                                               |
| #3            | #1 OR #2                                                                                                                                                                                                                                                                                                                                                                                                                                                                                                                                                                                                                                                                                                                                                                                                                                                                                                                                                                                                                                                                                                                                                                                                  |
| #4            | "Cognitive Behavioral Therapy"[Mesh]                                                                                                                                                                                                                                                                                                                                                                                                                                                                                                                                                                                                                                                                                                                                                                                                                                                                                                                                                                                                                                                                                                                                                                      |
| #5            | "behavioral therapies, cognitive"[Title/Abstract] OR "behavioral therapy, cognitive"[Title/Abstract] OR "cognitive behavioral Therap*"[Title/Abstract] OR "cognitive behavior therap*"[Title/Abstract] OR "cognitive psychotherap*"[Title/Abstract] OR "behavior modification"[Title/Abstract] OR "behavior therap*"[Title/Abstract] OR "cognitive therap*" [Title/Abstract] OR "psychotherapy*" [Title/Abstract]                                                                                                                                                                                                                                                                                                                                                                                                                                                                                                                                                                                                                                                                                                                                                                                         |
| #6            | #4 OR #5                                                                                                                                                                                                                                                                                                                                                                                                                                                                                                                                                                                                                                                                                                                                                                                                                                                                                                                                                                                                                                                                                                                                                                                                  |
| #7            | "Cytokines"[Mesh] OR "Chemokines"[Mesh] OR "Interleukins"[Mesh]                                                                                                                                                                                                                                                                                                                                                                                                                                                                                                                                                                                                                                                                                                                                                                                                                                                                                                                                                                                                                                                                                                                                           |
| #8            | "cytokine*" [Title/Abstract] OR "interleukin*" [Title/Abstract] OR "chemokine*" [Title/Abstract] OR "tumor necrosis factor"[Title/Abstract] OR "interferon"[Title/Abstract] OR "C-reactive protein"[Title/Abstract] OR "IFN"[Title/Abstract] OR "TNF"[Title/Abstract] OR "CRP"[Title/Abstract] OR "IL-1 $\beta$ "[Title/Abstract] OR "IL-2"[Title/Abstract] OR "IL-4"[Title/Abstract] OR "IL-6"[Title/Abstract] OR "IL-8"[Title/Abstract] OR "IL-10"[Title/Abstract] OR "IL-12"[Title/Abstract] OR "IL-18"[Title/Abstract] OR "TGF- $\beta$ "[Title/Abstract] OR "IFN- $\gamma$ "[Title/Abstract]) OR ("cytokine*" [Title/Abstract] OR "interleukin*" [Title/Abstract] OR "chemokine*" [Title/Abstract] OR "tumor necrosis factor"[Title/Abstract] OR "interferon"[Title/Abstract] OR "C-reactive protein"[Title/Abstract] OR "IFN"[Title/Abstract] OR "TNF"[Title/Abstract] OR "CRP"[Title/Abstract] OR "IL-1 $\beta$ "[Title/Abstract] OR "IL-2"[Title/Abstract] OR "IL-4"[Title/Abstract] OR "IL-6"[Title/Abstract] OR "IL-8"[Title/Abstract] OR "IL-10"[Title/Abstract] OR "IL-12"[Title/Abstract] OR "IL-18"[Title/Abstract] OR "TGF- $\beta$ "[Title/Abstract] OR "IFN- $\gamma$ "[Title/Abstract]) |
| #9            | #7 OR #8                                                                                                                                                                                                                                                                                                                                                                                                                                                                                                                                                                                                                                                                                                                                                                                                                                                                                                                                                                                                                                                                                                                                                                                                  |
| #10           | #3 AND #6 AND #9                                                                                                                                                                                                                                                                                                                                                                                                                                                                                                                                                                                                                                                                                                                                                                                                                                                                                                                                                                                                                                                                                                                                                                                          |

273

1  
2  
3 274  
4  
5 275  
6  
7  
8  
9  
10  
11  
12  
13  
14  
15  
16  
17  
18  
19  
20  
21  
22  
23  
24  
25  
26  
27  
28  
29  
30  
31  
32  
33  
34  
35  
36  
37  
38  
39  
40  
41  
42  
43  
44  
45  
46  
47  
48  
49  
50  
51  
52  
53  
54  
55  
56  
57  
58  
59  
60

For peer review only

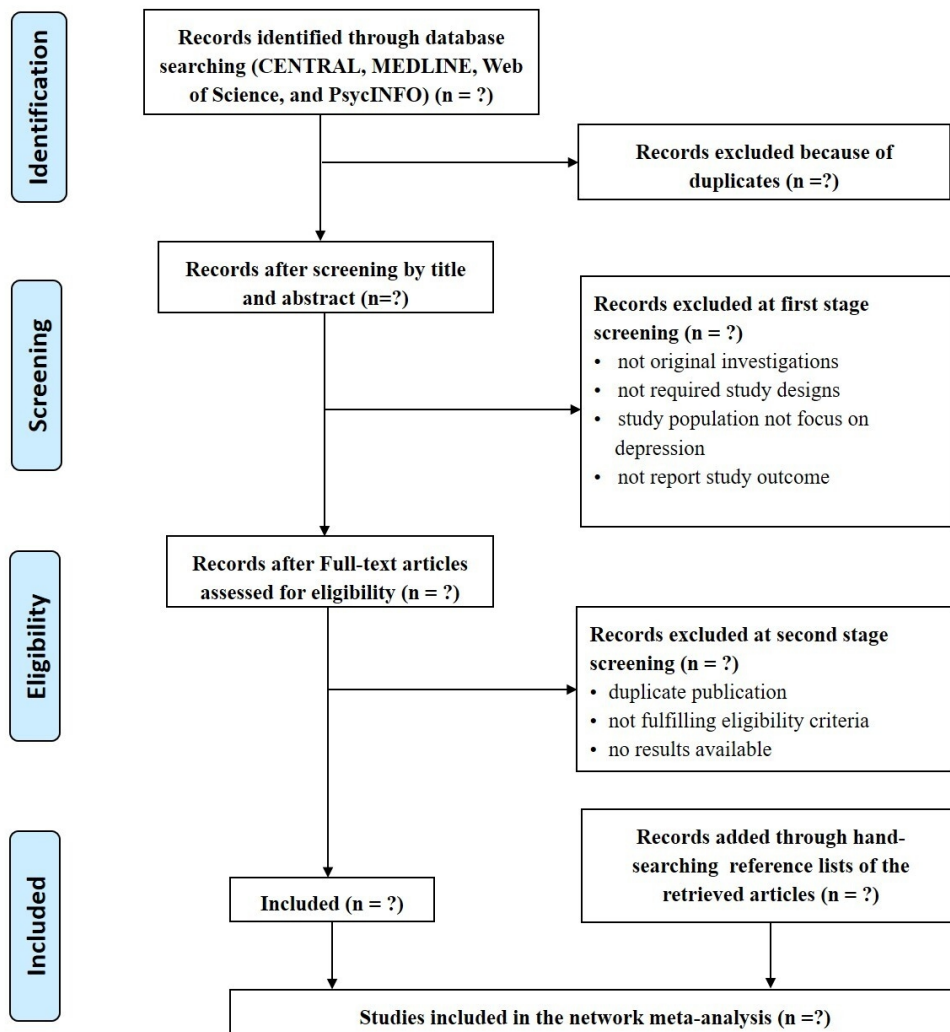

Figure 1. PRISMA flow diagram of study selection process.

100x106mm (300 x 300 DPI)

# Reporting checklist for protocol of a systematic review.

Based on the PRISMA-P guidelines.

## Instructions to authors

Complete this checklist by entering the page numbers from your manuscript where readers will find each of the items listed below.

Your article may not currently address all the items on the checklist. Please modify your text to include the missing information. If you are certain that an item does not apply, please write "n/a" and provide a short explanation.

Upload your completed checklist as an extra file when you submit to a journal.

In your methods section, say that you used the PRISMA-Preporting guidelines, and cite them as:

Moher D, Shamseer L, Clarke M, Ghersi D, Liberati A, Petticrew M, Shekelle P, Stewart LA. Preferred Reporting Items for Systematic Review and Meta-Analysis Protocols (PRISMA-P) 2015 statement. *Syst Rev.* 2015;4(1):1.

| Reporting Item      |                     |                                                                                                                                           | Page Number |
|---------------------|---------------------|-------------------------------------------------------------------------------------------------------------------------------------------|-------------|
| <b>Title</b>        |                     |                                                                                                                                           |             |
| Identification      | <a href="#">#1a</a> | Identify the report as a protocol of a systematic review                                                                                  | 1           |
| Update              | <a href="#">#1b</a> | If the protocol is for an update of a previous systematic review, identify as such                                                        | NA          |
| <b>Registration</b> |                     |                                                                                                                                           |             |
|                     | <a href="#">#2</a>  | If registered, provide the name of the registry (such as PROSPERO) and registration number                                                | 2           |
| <b>Authors</b>      |                     |                                                                                                                                           |             |
| Contact             | <a href="#">#3a</a> | Provide name, institutional affiliation, e-mail address of all protocol authors; provide physical mailing address of corresponding author | 1           |
| Contribution        | <a href="#">#3b</a> | Describe contributions of protocol authors and identify the guarantor of the review                                                       | 10          |

## Amendments

|    |                      |                      |                                                                           |     |
|----|----------------------|----------------------|---------------------------------------------------------------------------|-----|
| 1  |                      | <a href="#">#4</a>   | If the protocol represents an amendment of a previously completed or      | NA  |
| 2  |                      |                      | published protocol, identify as such and list changes; otherwise, state   |     |
| 3  |                      |                      | plan for documenting important protocol amendments                        |     |
| 4  |                      |                      |                                                                           |     |
| 5  |                      |                      |                                                                           |     |
| 6  | <b>Support</b>       |                      |                                                                           |     |
| 7  |                      |                      |                                                                           |     |
| 8  | Sources              | <a href="#">#5a</a>  | Indicate sources of financial or other support for the review             | 10  |
| 9  |                      |                      |                                                                           |     |
| 10 | Sponsor              | <a href="#">#5b</a>  | Provide name for the review funder and / or sponsor                       | 10  |
| 11 |                      |                      |                                                                           |     |
| 12 | Role of sponsor or   | <a href="#">#5c</a>  | Describe roles of funder(s), sponsor(s), and / or institution(s), if any, | 10  |
| 13 | funder               |                      | in developing the protocol                                                |     |
| 14 |                      |                      |                                                                           |     |
| 15 |                      |                      |                                                                           |     |
| 16 |                      |                      |                                                                           |     |
| 17 | <b>Introduction</b>  |                      |                                                                           |     |
| 18 |                      |                      |                                                                           |     |
| 19 | Rationale            | <a href="#">#6</a>   | Describe the rationale for the review in the context of what is already   | 4-5 |
| 20 |                      |                      | known                                                                     |     |
| 21 |                      |                      |                                                                           |     |
| 22 | Objectives           | <a href="#">#7</a>   | Provide an explicit statement of the question(s) the review will          | 5   |
| 23 |                      |                      | address with reference to participants, interventions, comparators, and   |     |
| 24 |                      |                      | outcomes (PICO)                                                           |     |
| 25 |                      |                      |                                                                           |     |
| 26 |                      |                      |                                                                           |     |
| 27 |                      |                      |                                                                           |     |
| 28 | <b>Methods</b>       |                      |                                                                           |     |
| 29 |                      |                      |                                                                           |     |
| 30 | Eligibility criteria | <a href="#">#8</a>   | Specify the study characteristics (such as PICO, study design, setting,   | 6-7 |
| 31 |                      |                      | time frame) and report characteristics (such as years considered,         |     |
| 32 |                      |                      | language, publication status) to be used as criteria for eligibility for  |     |
| 33 |                      |                      | the review                                                                |     |
| 34 |                      |                      |                                                                           |     |
| 35 | Information sources  | <a href="#">#9</a>   | Describe all intended information sources (such as electronic             | 6-7 |
| 36 |                      |                      | databases, contact with study authors, trial registers or other grey      |     |
| 37 |                      |                      | literature sources) with planned dates of coverage                        |     |
| 38 |                      |                      |                                                                           |     |
| 39 | Search strategy      | <a href="#">#10</a>  | Present draft of search strategy to be used for at least one electronic   | 6-7 |
| 40 |                      |                      | database, including planned limits, such that it could be repeated        |     |
| 41 |                      |                      |                                                                           |     |
| 42 | Study records - data | <a href="#">#11a</a> | Describe the mechanism(s) that will be used to manage records and         | 7   |
| 43 | management           |                      | data throughout the review                                                |     |
| 44 |                      |                      |                                                                           |     |
| 45 | Study records -      | <a href="#">#11b</a> | State the process that will be used for selecting studies (such as two    | 7   |
| 46 | selection process    |                      | independent reviewers) through each phase of the review (that is,         |     |
| 47 |                      |                      | screening, eligibility and inclusion in meta-analysis)                    |     |
| 48 |                      |                      |                                                                           |     |
| 49 | Study records - data | <a href="#">#11c</a> | Describe planned method of extracting data from reports (such as          | 7   |
| 50 | collection process   |                      | piloting forms, done independently, in duplicate), any processes for      |     |
| 51 |                      |                      |                                                                           |     |
| 52 |                      |                      |                                                                           |     |
| 53 |                      |                      |                                                                           |     |
| 54 |                      |                      |                                                                           |     |
| 55 |                      |                      |                                                                           |     |
| 56 |                      |                      |                                                                           |     |
| 57 |                      |                      |                                                                           |     |
| 58 |                      |                      |                                                                           |     |
| 59 |                      |                      |                                                                           |     |
| 60 |                      |                      |                                                                           |     |

|    |                    |                                                                                           |     |
|----|--------------------|-------------------------------------------------------------------------------------------|-----|
|    |                    | obtaining and confirming data from investigators                                          |     |
| 1  |                    |                                                                                           |     |
| 2  |                    |                                                                                           |     |
| 3  | Data items         | <a href="#">#12</a> List and define all variables for which data will be sought (such as  | 7   |
| 4  |                    | PICO items, funding sources), any pre-planned data assumptions and                        |     |
| 5  |                    | simplifications                                                                           |     |
| 6  |                    |                                                                                           |     |
| 7  |                    |                                                                                           |     |
| 8  | Outcomes and       | <a href="#">#13</a> List and define all outcomes for which data will be sought, including | 7   |
| 9  | prioritization     | prioritization of main and additional outcomes, with rationale                            |     |
| 10 |                    |                                                                                           |     |
| 11 | Risk of bias in    | <a href="#">#14</a> Describe anticipated methods for assessing risk of bias of individual | 8   |
| 12 | individual studies | studies, including whether this will be done at the outcome or study                      |     |
| 13 |                    | level, or both; state how this information will be used in data synthesis                 |     |
| 14 |                    |                                                                                           |     |
| 15 |                    |                                                                                           |     |
| 16 |                    |                                                                                           |     |
| 17 | Data synthesis     | <a href="#">#15a</a> Describe criteria under which study data will be quantitatively      | 7-8 |
| 18 |                    | synthesised                                                                               |     |
| 19 |                    |                                                                                           |     |
| 20 |                    |                                                                                           |     |
| 21 | Data synthesis     | <a href="#">#15b</a> If data are appropriate for quantitative synthesis, describe planned | 7-8 |
| 22 |                    | summary measures, methods of handling data and methods of                                 |     |
| 23 |                    | combining data from studies, including any planned exploration of                         |     |
| 24 |                    | consistency (such as I <sup>2</sup> , Kendall's $\tau$ )                                  |     |
| 25 |                    |                                                                                           |     |
| 26 |                    |                                                                                           |     |
| 27 |                    |                                                                                           |     |
| 28 | Data synthesis     | <a href="#">#15c</a> Describe any proposed additional analyses (such as sensitivity or    | 7-8 |
| 29 |                    | subgroup analyses, meta-regression)                                                       |     |
| 30 |                    |                                                                                           |     |
| 31 | Data synthesis     | <a href="#">#15d</a> If quantitative synthesis is not appropriate, describe the type of   | NA  |
| 32 |                    | summary planned                                                                           |     |
| 33 |                    |                                                                                           |     |
| 34 |                    |                                                                                           |     |
| 35 | Meta-bias(es)      | <a href="#">#16</a> Specify any planned assessment of meta-bias(es) (such as publication  | 8   |
| 36 |                    | bias across studies, selective reporting within studies)                                  |     |
| 37 |                    |                                                                                           |     |
| 38 |                    |                                                                                           |     |
| 39 | Confidence in      | <a href="#">#17</a> Describe how the strength of the body of evidence will be assessed    | 8   |
| 40 | cumulative         | (such as GRADE)                                                                           |     |
| 41 | evidence           |                                                                                           |     |
| 42 |                    |                                                                                           |     |
| 43 |                    |                                                                                           |     |

The PRISMA-P checklist is distributed under the terms of the Creative Commons Attribution License CC-BY 4.0. This checklist was completed on 18. December 2020 using <https://www.goodreports.org/>, a tool made by the [EQUATOR Network](#) in collaboration with [Penelope.ai](#)

# BMJ Open

## Does Cognitive Behavior Therapy Affect Inflammation of Depression? A Protocol for the Systematic Review and Meta-analysis

|                                 |                                                                                                                                                                                                                                                                                                       |
|---------------------------------|-------------------------------------------------------------------------------------------------------------------------------------------------------------------------------------------------------------------------------------------------------------------------------------------------------|
| Journal:                        | <i>BMJ Open</i>                                                                                                                                                                                                                                                                                       |
| Manuscript ID                   | bmjopen-2020-048162.R1                                                                                                                                                                                                                                                                                |
| Article Type:                   | Protocol                                                                                                                                                                                                                                                                                              |
| Date Submitted by the Author:   | 12-Jul-2021                                                                                                                                                                                                                                                                                           |
| Complete List of Authors:       | Cao, Bing; Southwest University,<br>Li, Ruonan; Southwest University<br>Ding, Ling; Jiangjin Central Hospital of Chongqing, Pharmacy<br>Department<br>Xu, Jiatong; Southwest University<br>Ma, Haijing; Southwest University<br>Liu, Jie; Jiangjin Central Hospital of Chongqing, Pharmacy Department |
| <b>Primary Subject Heading</b>: | Mental health                                                                                                                                                                                                                                                                                         |
| Secondary Subject Heading:      | Public health                                                                                                                                                                                                                                                                                         |
| Keywords:                       | Depression & mood disorders < PSYCHIATRY, CLINICAL PHYSIOLOGY, IMMUNOLOGY, MENTAL HEALTH                                                                                                                                                                                                              |
|                                 |                                                                                                                                                                                                                                                                                                       |

SCHOLARONE™  
Manuscripts



I, the Submitting Author has the right to grant and does grant on behalf of all authors of the Work (as defined in the below author licence), an exclusive licence and/or a non-exclusive licence for contributions from authors who are: i) UK Crown employees; ii) where BMJ has agreed a CC-BY licence shall apply, and/or iii) in accordance with the terms applicable for US Federal Government officers or employees acting as part of their official duties; on a worldwide, perpetual, irrevocable, royalty-free basis to BMJ Publishing Group Ltd ("BMJ") its licensees and where the relevant Journal is co-owned by BMJ to the co-owners of the Journal, to publish the Work in this journal and any other BMJ products and to exploit all rights, as set out in our [licence](#).

The Submitting Author accepts and understands that any supply made under these terms is made by BMJ to the Submitting Author unless you are acting as an employee on behalf of your employer or a postgraduate student of an affiliated institution which is paying any applicable article publishing charge ("APC") for Open Access articles. Where the Submitting Author wishes to make the Work available on an Open Access basis (and intends to pay the relevant APC), the terms of reuse of such Open Access shall be governed by a Creative Commons licence – details of these licences and which [Creative Commons](#) licence will apply to this Work are set out in our licence referred to above.

Other than as permitted in any relevant BMJ Author's Self Archiving Policies, I confirm this Work has not been accepted for publication elsewhere, is not being considered for publication elsewhere and does not duplicate material already published. I confirm all authors consent to publication of this Work and authorise the granting of this licence.



1  
2  
3 **1 Does Cognitive Behavior Therapy Affect Inflammation of Depression? A Protocol for**  
4 **the Systematic Review and Meta-analysis.**  
5  
6

7  
8  
9 3 Bing Cao <sup>1</sup>, Ruonan Li <sup>1</sup>, Ling Ding<sup>2</sup>, Jiatong Xu <sup>1</sup>, Haijing Ma <sup>1</sup>, Jie Liu<sup>2,\*</sup>

10  
11 4 <sup>1</sup> Key Laboratory of Cognition and Personality, Faculty of Psychology, Ministry of  
12 Education, Southwest University, Chongqing, 400715, P. R. China  
13

14  
15 6 <sup>2</sup> Pharmacy Department, Jiangjin Central Hospital of Chongqing, Chongqing, 402260, P.R.  
16 China  
17  
18  
19  
20

21  
22  
23 **9 Corresponding author**  
24

25 10 Jie Liu, Msc, Pharmacy Department, Jiangjin Central Hospital of Chongqing, 725  
26 Jiangzhou Avenue, Dingshan, Chongqing 402260, P.R. China. Tel: +86-15215051510,  
27  
28 11 Email: lj453039683@163.com  
29  
30  
31

32  
33  
34 **14 Word count**  
35

36  
37 **15 Abstract:** 247 words; **Text:** 1806 words; **Figures:** 1; **Tables:** 1.  
38  
39  
40  
41  
42  
43  
44  
45  
46  
47  
48  
49  
50  
51  
52  
53  
54  
55  
56  
57  
58  
59  
60

1  
2  
3 16 **Abstract**  
4  
5

6 17 **Introduction:** Cognitive behavior therapy (CBT) is becoming the most commonly  
7  
8 18 implemented and standard treatment for depression. Up to date, only a few number of  
9  
10 19 studies have investigated the potentially anti-inflammatory effects of CBT for depression  
11  
12 20 and results are inconsistent between studies. The current study aims to provide a  
13  
14 21 comprehensive, systematic review of the treatment effects of CBT on inflammation of  
15  
16 22 individuals with depression, and clarify the alterations of inflammatory cytokines pre- and  
17  
18 23 post- CBT treatment by meta-analysis.  
19  
20  
21  
22

23 24 **Methods and analysis:** This study will be conducted in accordance with the *Preferred*  
24  
25 25 *Reporting Items for Systematic Reviews and Meta-Analyses* (PRISMA) guidelines. A  
26  
27 26 systematic search of predetermined terms will be conducted with electronic databases of  
28  
29 27 CENTRAL, MEDLINE, EMBASE, and PsycINFO from inception to July 2021. Database  
30  
31 28 searches will be supplemented by expert contact, reference and citation checking, and grey  
32  
33 29 literature. Primary outcomes of interest will be validated measures of levels of  
34  
35 30 inflammatory cytokines pre- and post- CBT treatment in individuals with depression.  
36  
37 31 Hedges' g will be used to express the effect size (ES).  
38  
39  
40  
41

42 32 **Systematic review registration:** The protocol of current meta-analysis has been registered  
43  
44 33 at the Open Science Framework [<https://doi.org/10.17605/osf.io/tr9yh>].  
45  
46

47 34 **Ethics and Dissemination:** Formal ethical approval is not required by the National Ethical  
48  
49 35 Review Board in China as primary data will not be collected. The results alterations of  
50  
51 36 inflammatory cytokines pre- and post- CBT treatment in individuals with depression will  
52  
53  
54  
55  
56  
57  
58  
59  
60

1  
2  
3 37 be disseminated through a peer-reviewed publication and inform the most up-to-date  
4  
5 38 evidence of the roles of CBT treatment for depression.  
6  
7  
8 39

10  
11 40 **Keywords:** Depression; Cognitive Behavior Therapy; Inflammation; Cytokines; C-  
12  
13 41 reactive protein  
14  
15  
16 42

### 18 43 **Article Summary**

#### 20 44 *Strengths and limitations of this study*

- 22  
23 45 • This will be the first meta-analysis exploring the treatment effects of CBT on  
24  
25 46 inflammation of individuals with depression.  
26  
27  
28 47 • The results could provide the most up-to-date evidence to assist in shared decision  
29  
30 48 making between patients, caregivers, and clinicians in treating the individuals with  
31  
32 49 depression by using CBT.  
33  
34  
35 50 • An insufficient amount of original researches is a possible limitation.  
36  
37 51 • Potential high heterogeneity may cause selection bias and also decrease the reliability  
38  
39 52 of our results.  
40  
41  
42 53

## 54 **Introduction**

55 Depression is a severe and the most prevalent form of mental illness that characterized by  
56 neurocognitive deficits and disability <sup>1</sup>. The disorder manifests in millions of individuals  
57 worldwide, and is a global health priority. The exploration of underlying mechanisms of  
58 depression are increasing over the past decades, none of them could clearly clarify the  
59 potential triggers of depression <sup>2</sup>. In recent years, the inflammatory processes are  
60 considered to be important contributors to depression. A systematic review and meta-  
61 analysis confirmed that a high proportion of depressed individuals showed signs of  
62 inflammation<sup>3</sup>. The potential bidirectional relationship of depression and inflammation  
63 were also clarified <sup>4</sup>. For instance, early infection and autoimmune diseases are highly  
64 associated with high risk of depressive disorders in adulthood <sup>5</sup>; evidence from preclinical  
65 and clinical researches reached a consistency that the concentrations of pro-inflammatory  
66 cytokines are significantly increases in individuals or animal models of depression <sup>6</sup>. The  
67 inflammatory cytokines as mediators of environmental and genetic factors that may  
68 contribute to the development of depression from a biological perspective<sup>7</sup>. A previous  
69 study suggested that inflammation may be involved in some certain medical conditions,  
70 and it may activate the pathogenesis of depression by interfering with the monoamine,  
71 glutamate, and neurotrophic system <sup>8</sup>. Dowlat et al. 's study reported that major depression  
72 leads to immune dysregulation and activation of the inflammatory response system <sup>9</sup>. In  
73 addition, a growing number of evidence indicated that inflammation is thought to be an  
74 active process, which can affect multiple aspects of central nervous system function,  
75 including neurotransmitter metabolism, neuroendocrine function and information  
76 processing, leading to behavioral changes in individuals with depression <sup>10</sup>. The results of

1  
2  
3 77 several meta-analyses have proved that depression is related to chronic low-grade  
4  
5 78 inflammation, as manifested by higher concentrations of C-reactive protein (CRP),  
6  
7 79 interleukin-6 (IL-6), and tumor necrosis factor- $\alpha$  (TNF- $\alpha$ ), compared with healthy controls  
8  
9  
10 80 <sup>11 12</sup>. Above findings have facilitated the development of the inflammatory hypothesis of  
11  
12 81 depression, predicting that inflammation plays a role in the formation, progression and  
13  
14 82 perpetuation of depression.<sup>13 14</sup>. Cognitive behavior therapy (CBT) is becoming the most  
15  
16 83 commonly implemented and standard treatment for depression <sup>15</sup>. Briefly, CBT is based on  
17  
18 84 the premise that non-helpful faith and negative thoughts are the main causes of depression.  
19  
20 85 The individuals develop strategies for managing and preventing depressive symptoms by  
21  
22 86 monitoring mood symptoms and utilizing a repertoire of coping skills to manage stress in  
23  
24 87 CBT <sup>16</sup>. A meta-analysis found that there is no difference in treatment effects of CBT and  
25  
26 88 second generation antidepressants, either alone or in combination<sup>17</sup>. Recent published  
27  
28 89 literatures illustrated that similar with antidepressant treatment, CBT may also contribute  
29  
30 90 to reduction of chronic low-grade peripheral inflammation<sup>18</sup>. However, the underlying  
31  
32 91 biological processes of the CBT effects on depression are still very limited.

33  
34  
35  
36  
37  
38 92 To date, only a few number of studies have investigated the potentially anti-inflammatory  
39  
40 93 effects of CBT for depression and results are inconsistent between studies and the results  
41  
42 94 were inconsistent. For example, some researches pointed out that IL-6 was decreased after  
43  
44 95 CBT, while no significant changes were founded in other studies <sup>19</sup>. Keri et al. (2014)  
45  
46 96 demonstrated that in adults with a first episode of depression, 16 weeks of CBT alone was  
47  
48 97 associated with a reduction in TLR-4 signaling, but no change in TLR-2 signaling, IL-6,  
49  
50 98 or CRP levels, which suggested that it took longer time or other mechanisms for them to  
51  
52 99 normalize <sup>20</sup>. Additionally, whether the alterations of inflammatory cytokines associated

1  
2  
3 100 with improvements in depression after CBT treatment is also not well established. So far  
4  
5 101 it is worthy to conduct a systematic review and meta-analysis to summarize the most  
6  
7  
8 102 updated research results for the role of CBT treatment in inflammation of depression.  
9  
10  
11 103

## 14 104 **Aims and Objectives**

16  
17 105 The current study aims to provide a comprehensive, systematic review of the treatment  
18  
19 106 effects of CBT on inflammation of individuals with depression, and clarify the alterations  
20  
21 107 of inflammatory cytokines pre- and post- CBT treatment by meta-analysis. From the  
22  
23 108 previous evidence, we hypothesized that some inflammatory cytokines, such as CRP, IL-  
24  
25 109 6, TNF- $\alpha$ , may decrease after the CBT intervention.  
26  
27  
28  
29 110

## 32 111 **Methods**

### 35 112 *Search Strategy*

37  
38 113 The systematic review and meta-analysis will be conducted and reported in accordance  
39  
40 114 with the *Preferred Reporting Items for Systematic Reviews and Meta-Analyses (PRISMA)*  
41  
42 115 statement <sup>21</sup>. **Figure 1** summarizes the study selection as a PRISMA flowchart. A  
43  
44 116 systematic search of predetermined terms will be conducted with electronic databases of  
45  
46  
47 117 CENTRAL, MEDLINE, EMBASE, and PsycINFO from inception to July 2021. The  
48  
49 118 keywords of our search strategy will be the key terms mapped to subject headings for (i)  
50  
51 119 depression (major depressive disorder, depression, mood disorder, dysthymic disorder);  
52  
53  
54 120 (ii) CBT (psychotherapy, cognitive therapy, cognitive behavioral therapy); (iii)

1  
2  
3 121 inflammatory cytokines (cytokine, interleukin, chemokine, interferons, tumor necrosis  
4  
5 122 factor, as well as the specific inflammatory biomarkers). The search strategy of PubMed is  
6  
7  
8 123 shown in **Table 1**.

9  
10  
11 124 *Selection Criteria*

12  
13 125 The studies conducted the within-group comparisons of the peripheral levels of  
14  
15 126 cytokines and chemokines in participants with depression at baseline and after CBT will  
16  
17 127 be included in the current meta-analysis. Study eligibility for the inclusion will be assessed  
18  
19 128 by the approach of Population, Intervention, Comparison, Outcome and Study Design  
20  
21 129 (PICOS). Moreover, according to the quality assessment recommendation of Cochrane  
22  
23 130 Collaboration, we will use Newcastle-Ottawa Scale (NOS) to evaluate the quality of the  
24  
25 131 included literatures <sup>22</sup>. Population: adult subjects ( $\geq 18$  years old) meeting the major  
26  
27 132 depression diagnoses by the Diagnostic and Statistical Manual of Mental Disorders (DSM;  
28  
29 133 no restrictions on editions) or International Classification of Diseases and Related Health  
30  
31 134 Problems (ICD) criteria; Intervention and Comparison: assessed the results of  
32  
33 135 inflammatory cytokines (e.g., IL-6, CRP or IL-10) before and after CBT. Outcome:  
34  
35 136 reported mean or median resting levels of inflammatory cytokines in saliva, blood, or urine  
36  
37 137 was reported before and at least once after starting CBT, or the effect size could be  
38  
39 138 calculated from the reported results. Study Design: random controlled trial (RCT), open-  
40  
41 139 label study, or longitudinal study with pre-test-post-test design. Exclusion criteria of the  
42  
43 140 studies will meet if they (1) did not focus on evaluating inflammatory cytokines levels on  
44  
45 141 depression; (2) only reported stimulated levels of cytokines; (3) were repetitive  
46  
47 142 publications from the same datasets by the same or different authors; (4) included  
48  
49 143 participants who have been receiving pharmacological treatment in the past one month.  
50  
51  
52  
53  
54  
55  
56  
57  
58  
59  
60

### 144 *Outcome Measures and Data Extraction*

145 The outcome for this meta-analysis will be the changes of inflammatory cytokines pre-  
146 and post- CBT treatment in individuals with depression, as measured by the standard mean  
147 differences (SMDs) their concentrations. Paired investigators (Jiatong Xu and Haijing Ma)  
148 will independently select the studies, reviewed the main reports and supplementary  
149 materials, extracted the relevant information. All reference lists of the retrieved articles  
150 will be reviewed to identify the potential studies. The following information will be  
151 extracted from each study: first author, publication year, study design, country, geographic  
152 location, age, sex, intervention, duration of intervention, whether it is a major depressive  
153 episode (MDE), inflammatory biomarkers measured, type of sample specimen required for  
154 test, sample detection method, sample size, the mean levels of subjects' inflammatory  
155 cytokines and standard deviations (SDs) before and after CBT treatment.

### 156 *Statistical analysis*

157 Only the inflammatory cytokines with sufficient numbers of studies ( $\geq 3$ ) will be  
158 performed the meta-analysis. Analyses will be performed for pre- and post-treatment of  
159 CBT. The main analysis will be conducted with a random effects model. Forest plots will  
160 be used to estimate the alteration of the levels of inflammatory cytokines pre- and post-  
161 treatment CBT, which will be evaluated by SMD with a 95% confidence interval (CI). The  
162 effect size (ES) are expressed as Hedges'  $g$  in order to adjusted for a potential bias wo  
163 overestimate the effect size in small samples. According to the statistical power analysis  
164 for the behavioral sciences (2nd edition), the ES is judged using the values of 0.2, 0.5, and  
165 0.8 for small, medium and large (Cohen, 1988). In addition, we will conduct Bonferroni  
166 adjustment for multiple testing in meta-analysis, which means we will produce a rejection



1  
2  
3 167 p-value of 0.05 divided by the total number of outcomes <sup>23</sup>. The heterogeneity across the  
4  
5 168 studies will be evaluated by chi-square statistics and I-Squared ( $I^2$ ) test. A value of  $P < 0.10$   
6  
7  
8 169 or  $I^2 > 50\%$  indicated that the heterogeneity of effect estimates within each group of studies  
9  
10 170 was statistically significant <sup>24</sup>, which shows that the percentage of the variability in effect  
11  
12 171 estimates owes to heterogeneity rather than chance. Furtherly, the subgroup analysis and  
13  
14 172 meta-regression will also be performed to investigate the source of the heterogeneity, and  
15  
16 173 the potential influence of included characteristics of the studies on the pooled effect size.  
17  
18 174 Sensitivity analysis was performed to strengthen the results and investigate whether any  
19  
20 175 single study would have an effect on the heterogeneity of total measurements in each meta-  
21  
22 176 analysis. Additionally, the positive and negative results may not be equally likely to get  
23  
24 177 published, thus the funnel plot with Begg's test and Egger's test will be used for testing the  
25  
26 178 publication bias. If publication bias will be found, then the trim and fill method would be  
27  
28 179 used to both identify and correct the asymmetry of funnel plot. All two-tailed  $p$ -values  $<$   
29  
30 180 0.05 will be defined as statistical significance. All the data analyses will be conducted using  
31  
32 181 Stata (version 15.0, Stata Corp LP, College Station, TX, USA).

### 182 *Patient and public involvement*

183 Patients were not involved in the development of this systematic review protocol. The  
184 data for this systematic review will be collected from previously published studies.

### 185 *Ethics and Dissemination*

186 Formal ethical approval is not required as primary data will not be collected with the  
187 systematic review and meta-analysis. Data from previously published studies will be  
188 retrieved and analyzed. This study including protocol development will run from October  
189 2020 to October 2021. The results will be disseminated through a peer-reviewed

190 publication and inform the most up-to-date evidence of the roles of CBT treatment for  
191 depression.

192

## 193 **Discussion**

### 194 *Presentation of results and reporting*

195 Our current systematic review and meta-analysis will provide a comprehensive  
196 evidence for the treatment effects of CBT on inflammation of individuals with depression.  
197 We will use the PRISMA guidelines and checklist in the publication process. The  
198 quantitative data will be summarized and presented in tables, forest plots, and charts. The  
199 alterations of inflammatory cytokines pre- and post- CBT treatment in individuals with  
200 depression will be presented.

### 201 *Potential resources of limitations*

202 The current study is anticipated to have some limitations. Firstly, we might not find a  
203 sufficient amount of original researches to perform the analyses. Secondly, the potential  
204 high heterogeneity between studies in the exposure of interest and restriction to studies in  
205 English language, which will lead to selection bias and also decrease the reliability of our  
206 results.

207 To the best of our knowledge, this will be the first meta-analysis exploring the  
208 treatment effects of CBT on inflammation of individuals with depression. From our  
209 findings herein, we can provide the most up-to-date evidence to assist in shared decision  
210 making between patients, caregivers, and clinicians in treating the individuals with  
211 depression by using CBT and provide a foundation for future studies in this area.

1  
2  
3 **212 Contributorship statement**  
4

5 **213** Cao B, Xu JT and Ma HJ conceived the study and developed the search strategy. Cao  
6  
7 **214** B drafted the protocol and tested the search strategies in consultation with a librarian. Li  
8  
9 **215** RN, Ding L and Liu J provided advice on the protocol. All authors critically revised the  
10  
11 **216** protocol for methodological and intellectual content and have read and approved the final  
12  
13 **217** manuscript.  
14  
15  
16  
17  
18  
19

20 **219 Funding**  
21

22 **220** This research work is supported by funding from Southwest University (SWU019039),  
23  
24 **221** which funds Cao B. The funding bodies had no part in either the study design, conduct,  
25  
26 **222** analysis or interpretation of this study.  
27  
28  
29

30 **223 Competing interests**  
31

32 **224** None declared.  
33  
34

35 **225 Patient consent for publication**  
36

37 **226** Not required.  
38  
39

40 **227 Data statement**  
41

42 **228** No applicable.  
43  
44  
45  
46  
47  
48  
49  
50  
51  
52  
53  
54  
55  
56  
57  
58  
59  
60

229 **References**

- 230 1. Ang YS, Frontero N, Belleau E, et al. Disentangling vulnerability, state and trait features of  
231 neurocognitive impairments in depression. *Brain* 2020 doi: 10.1093/brain/awaa314  
232 [published Online First: 2020/11/12]
- 233 2. McIntosh AM, Hall LS, Zeng Y, et al. Genetic and Environmental Risk for Chronic Pain and the  
234 Contribution of Risk Variants for Major Depressive Disorder: A Family-Based Mixed-  
235 Model Analysis. *PLoS Med* 2016;13(8):e1002090. doi: 10.1371/journal.pmed.1002090  
236 [published Online First: 2016/08/17]
- 237 3. Osimo EF, Baxter LJ, Lewis G, et al. Prevalence of low-grade inflammation in depression: a  
238 systematic review and meta-analysis of CRP levels. *Psychological medicine*  
239 2019;49(12):1958-70. doi: 10.1017/S0033291719001454 [published Online First:  
240 2019/07/02]
- 241 4. Beurel E, Toups M, Nemeroff CB. The Bidirectional Relationship of Depression and  
242 Inflammation: Double Trouble. *Neuron* 2020;107(2):234-56. doi:  
243 10.1016/j.neuron.2020.06.002 [published Online First: 2020/06/20]
- 244 5. Benros ME, Waltoft BL, Nordentoft M, et al. Autoimmune diseases and severe infections as  
245 risk factors for mood disorders: a nationwide study. *JAMA Psychiatry* 2013;70(8):812-20.  
246 doi: 10.1001/jamapsychiatry.2013.1111 [published Online First: 2013/06/14]
- 247 6. Kim YK, Na KS, Myint AM, et al. The role of pro-inflammatory cytokines in neuroinflammation,  
248 neurogenesis and the neuroendocrine system in major depression. *Progress in neuro-*  
249 *psychopharmacology & biological psychiatry* 2016;64:277-84. doi:  
250 10.1016/j.pnpbp.2015.06.008 [published Online First: 2015/06/27]
- 251 7. Song C, Wang H. Cytokines mediated inflammation and decreased neurogenesis in animal  
252 models of depression. *Progress in neuro-psychopharmacology & biological psychiatry*  
253 2011;35(3):760-8. doi: 10.1016/j.pnpbp.2010.06.020 [published Online First:  
254 2010/07/06]
- 255 8. McNally L, Bhagwagar Z, Hannestad J. Inflammation, glutamate, and glia in depression: a  
256 literature review. *CNS Spectr* 2008;13(6):501-10. doi: 10.1017/s1092852900016734  
257 [published Online First: 2008/06/24]
- 258 9. Dowlati Y, Herrmann N, Swardfager W, et al. A meta-analysis of cytokines in major  
259 depression. *Biol Psychiatry* 2010;67(5):446-57. doi: 10.1016/j.biopsych.2009.09.033  
260 [published Online First: 2009/12/18]
- 261 10. Irwin MR, Miller AH. Depressive disorders and immunity: 20 years of progress and discovery.  
262 *Brain Behav Immun* 2007;21(4):374-83. doi: 10.1016/j.bbi.2007.01.010 [published  
263 Online First: 2007/03/16]
- 264 11. Kohler CA, Freitas TH, Stubbs B, et al. Peripheral Alterations in Cytokine and Chemokine  
265 Levels After Antidepressant Drug Treatment for Major Depressive Disorder: Systematic  
266 Review and Meta-Analysis. *Molecular neurobiology* 2018;55(5):4195-206. doi:  
267 10.1007/s12035-017-0632-1 [published Online First: 2017/06/15]
- 268 12. Wiedlocha M, Marcinowicz P, Krupa R, et al. Effect of antidepressant treatment on  
269 peripheral inflammation markers - A meta-analysis. *Progress in neuro-*  
270 *psychopharmacology & biological psychiatry* 2018;80(Pt C):217-26. doi:  
271 10.1016/j.pnpbp.2017.04.026 [published Online First: 2017/04/27]
- 272 13. Kohler-Forsberg O, C NL, Hjorthoj C, et al. Efficacy of anti-inflammatory treatment on major  
273 depressive disorder or depressive symptoms: meta-analysis of clinical trials. *Acta*

- 1  
2  
3 274 *psychiatrica Scandinavica* 2019;139(5):404-19. doi: 10.1111/acps.13016 [published  
4 275 Online First: 2019/03/06]  
5 276 14. Husain MI, Strawbridge R, Stokes PR, et al. Anti-inflammatory treatments for mood  
6 277 disorders: Systematic review and meta-analysis. *Journal of psychopharmacology*  
7 278 (Oxford, England) 2017;31(9):1137-48. doi: 10.1177/0269881117725711 [published  
8 279 Online First: 2017/09/01]  
9 280 15. Lopez MA, Basco MA. Effectiveness of cognitive behavioral therapy in public mental health:  
10 281 comparison to treatment as usual for treatment-resistant depression. *Adm Policy Ment*  
11 282 *Health* 2015;42(1):87-98. doi: 10.1007/s10488-014-0546-4 [published Online First:  
12 283 2014/04/03]  
13 284 16. Pearlstein JG, Staudenmaier PJ, West AE, et al. Immune response to stress induction as a  
14 285 predictor of cognitive-behavioral therapy outcomes in adolescent mood disorders: A  
15 286 pilot study. *J Psychiatr Res* 2020;120:56-63. doi: 10.1016/j.jpsychires.2019.10.012  
16 287 [published Online First: 2019/10/22]  
17 288 17. Amick HR, Gartlehner G, Gaynes BN, et al. Comparative benefits and harms of second  
18 289 generation antidepressants and cognitive behavioral therapies in initial treatment of  
19 290 major depressive disorder: systematic review and meta-analysis. *BMJ* 2015;351:h6019.  
20 291 doi: 10.1136/bmj.h6019 [published Online First: 2015/12/10]  
21 292 18. Lopresti AL. Cognitive behaviour therapy and inflammation: A systematic review of its  
22 293 relationship and the potential implications for the treatment of depression. *Aust N Z J*  
23 294 *Psychiatry* 2017;51(6):565-82. doi: 10.1177/0004867417701996 [published Online First:  
24 295 2017/04/07]  
25 296 19. Felger JC, Lotrich FE. Inflammatory cytokines in depression: neurobiological mechanisms and  
26 297 therapeutic implications. *Neuroscience* 2013;246:199-229. doi:  
27 298 10.1016/j.neuroscience.2013.04.060 [published Online First: 2013/05/07]  
28 299 20. Keri S, Szabo C, Kelemen O. Expression of Toll-Like Receptors in peripheral blood  
29 300 mononuclear cells and response to cognitive-behavioral therapy in major depressive  
30 301 disorder. *Brain Behav Immun* 2014;40:235-43. doi: 10.1016/j.bbi.2014.03.020  
31 302 [published Online First: 2014/04/15]  
32 303 21. Moher D, Liberati A, Tetzlaff J, et al. Preferred reporting items for systematic reviews and  
33 304 meta-analyses: the PRISMA statement. *PLoS Med* 2009;6(7):e1000097. doi:  
34 305 10.1371/journal.pmed.1000097  
35 306 22. Lo CK, Mertz D, Loeb M. Newcastle-Ottawa Scale: comparing reviewers' to authors'  
36 307 assessments. *BMC Med Res Methodol* 2014;14:45. doi: 10.1186/1471-2288-14-45  
37 308 23. Ng A, Tam WW, Zhang MW, et al. IL-1beta, IL-6, TNF- alpha and CRP in Elderly Patients with  
38 309 Depression or Alzheimer's disease: Systematic Review and Meta-Analysis. *Sci Rep*  
39 310 2018;8(1):12050. doi: 10.1038/s41598-018-30487-6 [published Online First:  
40 311 2018/08/15]  
41 312 24. Cao B, Wang DF, Xu MY, et al. Lower folate levels in schizophrenia: A meta-analysis.  
42 313 *Psychiatry Res* 2016;245:1-7. doi: 10.1016/j.psychres.2016.03.003

314

1  
2  
3  
4  
5  
6  
7  
8  
9  
10  
11  
12  
13  
14  
15  
16  
17  
18  
19  
20  
21  
22  
23  
24  
25  
26  
27  
28  
29  
30  
31  
32  
33  
34  
35  
36  
37  
38  
39  
40  
41  
42  
43  
44  
45  
46  
47  
48  
49  
50  
51  
52  
53  
54  
55  
56  
57  
58  
59  
60

316 **Figure Legend**

317 **Figure 1.** PRISMA flow diagram of study selection process.

318

For peer review only

319

320

**Table 1. Search strategy for PubMed**

| Search number | Query                                                                                                                                                                                                                                                                                                                                                                                                                                                                                                                                                                                                                                                                                                                                                                                                                                                                                                                                                                                                                                                                                                                                                                                                     |
|---------------|-----------------------------------------------------------------------------------------------------------------------------------------------------------------------------------------------------------------------------------------------------------------------------------------------------------------------------------------------------------------------------------------------------------------------------------------------------------------------------------------------------------------------------------------------------------------------------------------------------------------------------------------------------------------------------------------------------------------------------------------------------------------------------------------------------------------------------------------------------------------------------------------------------------------------------------------------------------------------------------------------------------------------------------------------------------------------------------------------------------------------------------------------------------------------------------------------------------|
| #1            | "major depression"[Title/Abstract] OR "major depressive disorder"[Title/Abstract] OR "depressive symptom*"[Title/Abstract] OR "symptom, depressive"[Title/Abstract] OR "depress*"[Title/Abstract] OR "dysphor*"[Title/Abstract] OR "dysthym*"[Title/Abstract] OR "adjustment disorder*"[Title/Abstract] OR "mood disorder*"[Title/Abstract] OR "affective disorder"[Title/Abstract] OR "affective disorders"[Title/Abstract] OR "emotional depression*"[Title/Abstract]                                                                                                                                                                                                                                                                                                                                                                                                                                                                                                                                                                                                                                                                                                                                   |
| #2            | "Depression"[Mesh] OR "Depressive Disorder"[Mesh] OR "Depressive Disorder, Treatment-Resistant"[Mesh] OR "Depressive Disorder, Major"[Mesh]                                                                                                                                                                                                                                                                                                                                                                                                                                                                                                                                                                                                                                                                                                                                                                                                                                                                                                                                                                                                                                                               |
| #3            | #1 OR #2                                                                                                                                                                                                                                                                                                                                                                                                                                                                                                                                                                                                                                                                                                                                                                                                                                                                                                                                                                                                                                                                                                                                                                                                  |
| #4            | "Cognitive Behavioral Therapy"[Mesh]                                                                                                                                                                                                                                                                                                                                                                                                                                                                                                                                                                                                                                                                                                                                                                                                                                                                                                                                                                                                                                                                                                                                                                      |
| #5            | "behavioral therapies, cognitive"[Title/Abstract] OR "behavioral therapy, cognitive"[Title/Abstract] OR "cognitive behavioral Therap*"[Title/Abstract] OR "cognitive behavior therap*"[Title/Abstract] OR "cognitive psychotherap*"[Title/Abstract] OR "behavior modification"[Title/Abstract] OR "behavior therap*"[Title/Abstract] OR "cognitive therap*" [Title/Abstract] OR "psychotherapy*" [Title/Abstract]                                                                                                                                                                                                                                                                                                                                                                                                                                                                                                                                                                                                                                                                                                                                                                                         |
| #6            | #4 OR #5                                                                                                                                                                                                                                                                                                                                                                                                                                                                                                                                                                                                                                                                                                                                                                                                                                                                                                                                                                                                                                                                                                                                                                                                  |
| #7            | "Cytokines"[Mesh] OR "Chemokines"[Mesh] OR "Interleukins"[Mesh]                                                                                                                                                                                                                                                                                                                                                                                                                                                                                                                                                                                                                                                                                                                                                                                                                                                                                                                                                                                                                                                                                                                                           |
| #8            | "cytokine*" [Title/Abstract] OR "interleukin*" [Title/Abstract] OR "chemokine*" [Title/Abstract] OR "tumor necrosis factor"[Title/Abstract] OR "interferon"[Title/Abstract] OR "C-reactive protein"[Title/Abstract] OR "IFN"[Title/Abstract] OR "TNF"[Title/Abstract] OR "CRP"[Title/Abstract] OR "IL-1 $\beta$ "[Title/Abstract] OR "IL-2"[Title/Abstract] OR "IL-4"[Title/Abstract] OR "IL-6"[Title/Abstract] OR "IL-8"[Title/Abstract] OR "IL-10"[Title/Abstract] OR "IL-12"[Title/Abstract] OR "IL-18"[Title/Abstract] OR "TGF- $\beta$ "[Title/Abstract] OR "IFN- $\gamma$ "[Title/Abstract]) OR ("cytokine*" [Title/Abstract] OR "interleukin*" [Title/Abstract] OR "chemokine*" [Title/Abstract] OR "tumor necrosis factor"[Title/Abstract] OR "interferon"[Title/Abstract] OR "C-reactive protein"[Title/Abstract] OR "IFN"[Title/Abstract] OR "TNF"[Title/Abstract] OR "CRP"[Title/Abstract] OR "IL-1 $\beta$ "[Title/Abstract] OR "IL-2"[Title/Abstract] OR "IL-4"[Title/Abstract] OR "IL-6"[Title/Abstract] OR "IL-8"[Title/Abstract] OR "IL-10"[Title/Abstract] OR "IL-12"[Title/Abstract] OR "IL-18"[Title/Abstract] OR "TGF- $\beta$ "[Title/Abstract] OR "IFN- $\gamma$ "[Title/Abstract]) |
| #9            | #7 OR #8                                                                                                                                                                                                                                                                                                                                                                                                                                                                                                                                                                                                                                                                                                                                                                                                                                                                                                                                                                                                                                                                                                                                                                                                  |
| #10           | #3 AND #6 AND #9                                                                                                                                                                                                                                                                                                                                                                                                                                                                                                                                                                                                                                                                                                                                                                                                                                                                                                                                                                                                                                                                                                                                                                                          |

321

1  
2  
3 322  
4  
5 323  
6  
7  
8  
9  
10  
11  
12  
13  
14  
15  
16  
17  
18  
19  
20  
21  
22  
23  
24  
25  
26  
27  
28  
29  
30  
31  
32  
33  
34  
35  
36  
37  
38  
39  
40  
41  
42  
43  
44  
45  
46  
47  
48  
49  
50  
51  
52  
53  
54  
55  
56  
57  
58  
59  
60

For peer review only



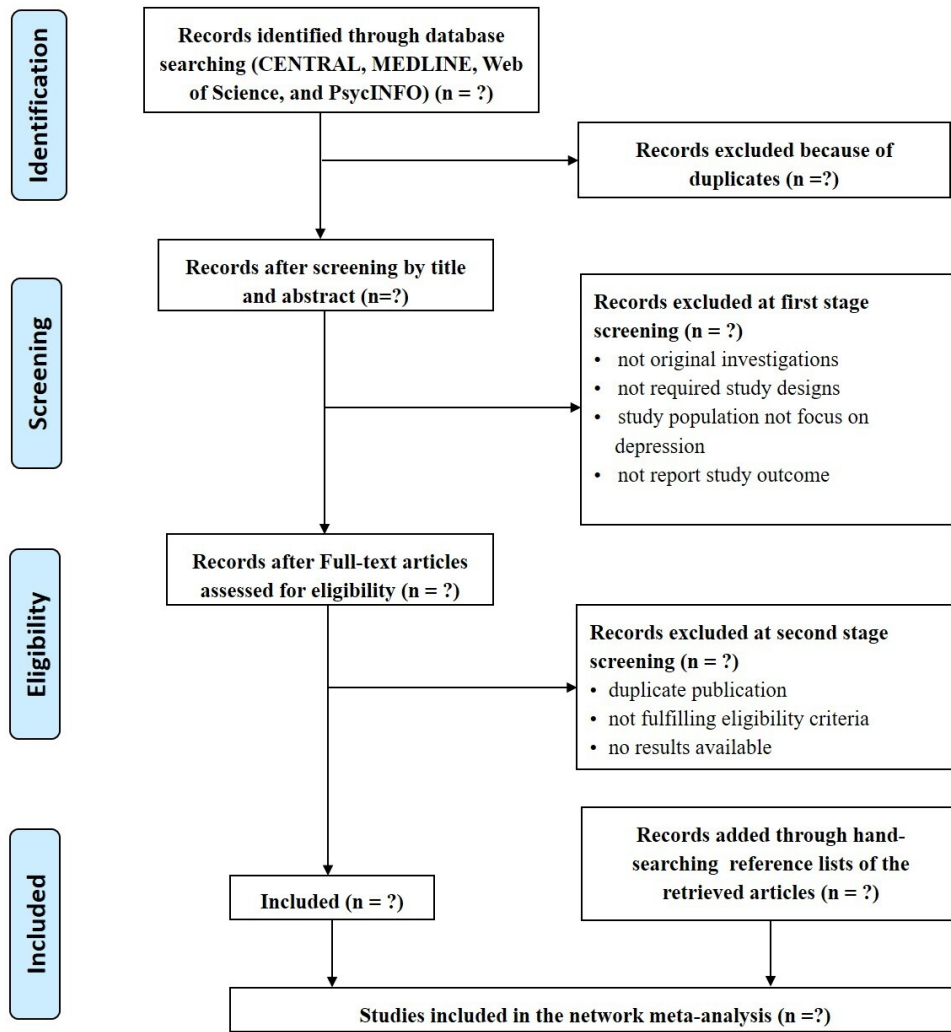

Figure 1. PRISMA flow diagram of study selection process.

100x106mm (300 x 300 DPI)

# Reporting checklist for protocol of a systematic review.

Based on the PRISMA-P guidelines.

## Instructions to authors

Complete this checklist by entering the page numbers from your manuscript where readers will find each of the items listed below.

Your article may not currently address all the items on the checklist. Please modify your text to include the missing information. If you are certain that an item does not apply, please write "n/a" and provide a short explanation.

Upload your completed checklist as an extra file when you submit to a journal.

In your methods section, say that you used the PRISMA-Reporting guidelines, and cite them as:

Moher D, Shamseer L, Clarke M, Ghersi D, Liberati A, Petticrew M, Shekelle P, Stewart LA. Preferred Reporting Items for Systematic Review and Meta-Analysis Protocols (PRISMA-P) 2015 statement. *Syst Rev.* 2015;4(1):1.

| Reporting Item      |                     |                                                                                                                                           | Page Number |
|---------------------|---------------------|-------------------------------------------------------------------------------------------------------------------------------------------|-------------|
| <b>Title</b>        |                     |                                                                                                                                           |             |
| Identification      | <a href="#">#1a</a> | Identify the report as a protocol of a systematic review                                                                                  | 1           |
| Update              | <a href="#">#1b</a> | If the protocol is for an update of a previous systematic review, identify as such                                                        | NA          |
| <b>Registration</b> |                     |                                                                                                                                           |             |
|                     | <a href="#">#2</a>  | If registered, provide the name of the registry (such as PROSPERO) and registration number                                                | 2           |
| <b>Authors</b>      |                     |                                                                                                                                           |             |
| Contact             | <a href="#">#3a</a> | Provide name, institutional affiliation, e-mail address of all protocol authors; provide physical mailing address of corresponding author | 1           |
| Contribution        | <a href="#">#3b</a> | Describe contributions of protocol authors and identify the guarantor of the review                                                       | 10          |
| <b>Amendments</b>   |                     |                                                                                                                                           |             |

|    |                      |                                                                                               |     |
|----|----------------------|-----------------------------------------------------------------------------------------------|-----|
| 1  | <a href="#">#4</a>   | If the protocol represents an amendment of a previously completed or                          | NA  |
| 2  |                      | published protocol, identify as such and list changes; otherwise, state                       |     |
| 3  |                      | plan for documenting important protocol amendments                                            |     |
| 4  |                      |                                                                                               |     |
| 5  |                      |                                                                                               |     |
| 6  | <b>Support</b>       |                                                                                               |     |
| 7  |                      |                                                                                               |     |
| 8  | Sources              | <a href="#">#5a</a> Indicate sources of financial or other support for the review             | 10  |
| 9  |                      |                                                                                               |     |
| 10 | Sponsor              | <a href="#">#5b</a> Provide name for the review funder and / or sponsor                       | 10  |
| 11 |                      |                                                                                               |     |
| 12 | Role of sponsor or   | <a href="#">#5c</a> Describe roles of funder(s), sponsor(s), and / or institution(s), if any, | 10  |
| 13 | funder               | in developing the protocol                                                                    |     |
| 14 |                      |                                                                                               |     |
| 15 |                      |                                                                                               |     |
| 16 |                      |                                                                                               |     |
| 17 | <b>Introduction</b>  |                                                                                               |     |
| 18 |                      |                                                                                               |     |
| 19 | Rationale            | <a href="#">#6</a> Describe the rationale for the review in the context of what is already    | 4-5 |
| 20 |                      | known                                                                                         |     |
| 21 |                      |                                                                                               |     |
| 22 | Objectives           | <a href="#">#7</a> Provide an explicit statement of the question(s) the review will           | 5   |
| 23 |                      | address with reference to participants, interventions, comparators, and                       |     |
| 24 |                      | outcomes (PICO)                                                                               |     |
| 25 |                      |                                                                                               |     |
| 26 |                      |                                                                                               |     |
| 27 |                      |                                                                                               |     |
| 28 | <b>Methods</b>       |                                                                                               |     |
| 29 |                      |                                                                                               |     |
| 30 | Eligibility criteria | <a href="#">#8</a> Specify the study characteristics (such as PICO, study design, setting,    | 6-7 |
| 31 |                      | time frame) and report characteristics (such as years considered,                             |     |
| 32 |                      | language, publication status) to be used as criteria for eligibility for                      |     |
| 33 |                      | the review                                                                                    |     |
| 34 |                      |                                                                                               |     |
| 35 | Information sources  | <a href="#">#9</a> Describe all intended information sources (such as electronic              | 6-7 |
| 36 |                      | databases, contact with study authors, trial registers or other grey                          |     |
| 37 |                      | literature sources) with planned dates of coverage                                            |     |
| 38 |                      |                                                                                               |     |
| 39 | Search strategy      | <a href="#">#10</a> Present draft of search strategy to be used for at least one electronic   | 6-7 |
| 40 |                      | database, including planned limits, such that it could be repeated                            |     |
| 41 |                      |                                                                                               |     |
| 42 | Study records - data | <a href="#">#11a</a> Describe the mechanism(s) that will be used to manage records and        | 7   |
| 43 | management           | data throughout the review                                                                    |     |
| 44 |                      |                                                                                               |     |
| 45 | Study records -      | <a href="#">#11b</a> State the process that will be used for selecting studies (such as two   | 7   |
| 46 | selection process    | independent reviewers) through each phase of the review (that is,                             |     |
| 47 |                      | screening, eligibility and inclusion in meta-analysis)                                        |     |
| 48 |                      |                                                                                               |     |
| 49 | Study records - data | <a href="#">#11c</a> Describe planned method of extracting data from reports (such as         | 7   |
| 50 | collection process   | piloting forms, done independently, in duplicate), any processes for                          |     |
| 51 |                      |                                                                                               |     |
| 52 |                      |                                                                                               |     |
| 53 |                      |                                                                                               |     |
| 54 |                      |                                                                                               |     |
| 55 |                      |                                                                                               |     |
| 56 |                      |                                                                                               |     |
| 57 |                      |                                                                                               |     |
| 58 |                      |                                                                                               |     |
| 59 |                      |                                                                                               |     |
| 60 |                      |                                                                                               |     |

|    |                    |                                                                                           |     |
|----|--------------------|-------------------------------------------------------------------------------------------|-----|
|    |                    | obtaining and confirming data from investigators                                          |     |
| 1  |                    |                                                                                           |     |
| 2  |                    |                                                                                           |     |
| 3  | Data items         | <a href="#">#12</a> List and define all variables for which data will be sought (such as  | 7   |
| 4  |                    | PICO items, funding sources), any pre-planned data assumptions and                        |     |
| 5  |                    | simplifications                                                                           |     |
| 6  |                    |                                                                                           |     |
| 7  |                    |                                                                                           |     |
| 8  | Outcomes and       | <a href="#">#13</a> List and define all outcomes for which data will be sought, including | 7   |
| 9  | prioritization     | prioritization of main and additional outcomes, with rationale                            |     |
| 10 |                    |                                                                                           |     |
| 11 |                    |                                                                                           |     |
| 12 | Risk of bias in    | <a href="#">#14</a> Describe anticipated methods for assessing risk of bias of individual | 8   |
| 13 | individual studies | studies, including whether this will be done at the outcome or study                      |     |
| 14 |                    | level, or both; state how this information will be used in data synthesis                 |     |
| 15 |                    |                                                                                           |     |
| 16 |                    |                                                                                           |     |
| 17 | Data synthesis     | <a href="#">#15a</a> Describe criteria under which study data will be quantitatively      | 7-8 |
| 18 |                    | synthesised                                                                               |     |
| 19 |                    |                                                                                           |     |
| 20 |                    |                                                                                           |     |
| 21 | Data synthesis     | <a href="#">#15b</a> If data are appropriate for quantitative synthesis, describe planned | 7-8 |
| 22 |                    | summary measures, methods of handling data and methods of                                 |     |
| 23 |                    | combining data from studies, including any planned exploration of                         |     |
| 24 |                    | consistency (such as I <sup>2</sup> , Kendall's $\tau$ )                                  |     |
| 25 |                    |                                                                                           |     |
| 26 |                    |                                                                                           |     |
| 27 |                    |                                                                                           |     |
| 28 | Data synthesis     | <a href="#">#15c</a> Describe any proposed additional analyses (such as sensitivity or    | 7-8 |
| 29 |                    | subgroup analyses, meta-regression)                                                       |     |
| 30 |                    |                                                                                           |     |
| 31 | Data synthesis     | <a href="#">#15d</a> If quantitative synthesis is not appropriate, describe the type of   | NA  |
| 32 |                    | summary planned                                                                           |     |
| 33 |                    |                                                                                           |     |
| 34 |                    |                                                                                           |     |
| 35 | Meta-bias(es)      | <a href="#">#16</a> Specify any planned assessment of meta-bias(es) (such as publication  | 8   |
| 36 |                    | bias across studies, selective reporting within studies)                                  |     |
| 37 |                    |                                                                                           |     |
| 38 |                    |                                                                                           |     |
| 39 | Confidence in      | <a href="#">#17</a> Describe how the strength of the body of evidence will be assessed    | 8   |
| 40 | cumulative         | (such as GRADE)                                                                           |     |
| 41 | evidence           |                                                                                           |     |
| 42 |                    |                                                                                           |     |
| 43 |                    |                                                                                           |     |

The PRISMA-P checklist is distributed under the terms of the Creative Commons Attribution License CC-BY 4.0. This checklist was completed on 18. December 2020 using <https://www.goodreports.org/>, a tool made by the [EQUATOR Network](#) in collaboration with [Penelope.ai](#)

# BMJ Open

## Does Cognitive Behavior Therapy Affect Peripheral Inflammation of Depression? A Protocol for the Systematic Review and Meta-analysis.

|                                 |                                                                                                                                                                                                                                                                                                                                                                                         |
|---------------------------------|-----------------------------------------------------------------------------------------------------------------------------------------------------------------------------------------------------------------------------------------------------------------------------------------------------------------------------------------------------------------------------------------|
| Journal:                        | <i>BMJ Open</i>                                                                                                                                                                                                                                                                                                                                                                         |
| Manuscript ID                   | bmjopen-2020-048162.R2                                                                                                                                                                                                                                                                                                                                                                  |
| Article Type:                   | Protocol                                                                                                                                                                                                                                                                                                                                                                                |
| Date Submitted by the Author:   | 22-Sep-2021                                                                                                                                                                                                                                                                                                                                                                             |
| Complete List of Authors:       | Cao, Bing; Southwest University,<br>Li, Ruonan; Southwest University<br>Ding, Ling; Jiangjin Central Hospital of Chongqing, Pharmacy Department<br>Xu, Jiatong; Southwest University<br>Ma, Haijing; Southwest University<br>Liu, Jie; Jiangjin Central Hospital of Chongqing, Pharmacy Department<br>Xue, Jian; Zunyi Medical and Pharmaceutical College, Health Management Department |
| <b>Primary Subject Heading</b>: | Mental health                                                                                                                                                                                                                                                                                                                                                                           |
| Secondary Subject Heading:      | Public health                                                                                                                                                                                                                                                                                                                                                                           |
| Keywords:                       | Depression & mood disorders < PSYCHIATRY, CLINICAL PHYSIOLOGY, IMMUNOLOGY, MENTAL HEALTH                                                                                                                                                                                                                                                                                                |
|                                 |                                                                                                                                                                                                                                                                                                                                                                                         |

SCHOLARONE™  
Manuscripts



I, the Submitting Author has the right to grant and does grant on behalf of all authors of the Work (as defined in the below author licence), an exclusive licence and/or a non-exclusive licence for contributions from authors who are: i) UK Crown employees; ii) where BMJ has agreed a CC-BY licence shall apply, and/or iii) in accordance with the terms applicable for US Federal Government officers or employees acting as part of their official duties; on a worldwide, perpetual, irrevocable, royalty-free basis to BMJ Publishing Group Ltd ("BMJ") its licensees and where the relevant Journal is co-owned by BMJ to the co-owners of the Journal, to publish the Work in this journal and any other BMJ products and to exploit all rights, as set out in our [licence](#).

The Submitting Author accepts and understands that any supply made under these terms is made by BMJ to the Submitting Author unless you are acting as an employee on behalf of your employer or a postgraduate student of an affiliated institution which is paying any applicable article publishing charge ("APC") for Open Access articles. Where the Submitting Author wishes to make the Work available on an Open Access basis (and intends to pay the relevant APC), the terms of reuse of such Open Access shall be governed by a Creative Commons licence – details of these licences and which [Creative Commons](#) licence will apply to this Work are set out in our licence referred to above.

Other than as permitted in any relevant BMJ Author's Self Archiving Policies, I confirm this Work has not been accepted for publication elsewhere, is not being considered for publication elsewhere and does not duplicate material already published. I confirm all authors consent to publication of this Work and authorise the granting of this licence.

1  
2  
3 **1 Does Cognitive Behavior Therapy Affect Peripheral Inflammation of Depression? A**  
4  
5 **2 Protocol for the Systematic Review and Meta-analysis.**  
6  
7

8 Bing Cao <sup>1#</sup>, Ruonan Li <sup>1#</sup>, Ling Ding<sup>2</sup>, Jiatong Xu <sup>1</sup>, Haijing Ma <sup>1</sup>, Jie Liu<sup>2</sup>, Jian Xue <sup>3,\*</sup>  
9

10  
11 <sup>1</sup> Key Laboratory of Cognition and Personality, Faculty of Psychology, Ministry of  
12 Education, Southwest University, Chongqing, 400715, P. R. China  
13

14  
15 <sup>2</sup> Pharmacy Department, Jiangjin Central Hospital of Chongqing, Chongqing, 402260, P.R.  
16 China  
17

18  
19 <sup>3</sup> Health Management Department, Zunyi Medical and Pharmaceutical College, Zunyi,  
20 Guizhou 563006, China.  
21

22  
23 # The two authors contribute equally to this work  
24

25  
26  
27  
28  
29  
30  
31

32 **Corresponding author**

33 Jian Xue, PhD, Health Management Department, Zunyi Medical and Pharmaceutical  
34 College, Zunyi, Guizhou 563006, China. Email: xuejian912@163.com  
35

36  
37 **Word count**

38  
39 **Abstract:** 247 words; **Text:** 1806 words; **Figures:** 1; **Tables:** 1.  
40  
41  
42  
43  
44  
45  
46  
47  
48  
49  
50  
51  
52  
53  
54  
55  
56  
57  
58  
59  
60

1  
2  
3 **17 Abstract**  
4  
5

6 **18 Introduction:** Cognitive behavior therapy (CBT) is becoming the most commonly  
7  
8  
9  
10  
11  
12  
13  
14  
15  
16  
17  
18  
19  
20  
21  
22  
23  
24  
25  
26  
27  
28  
29  
30  
31  
32  
33  
34  
35  
36  
37  
38  
39  
40  
41  
42  
43  
44  
45  
46  
47  
48  
49  
50  
51  
52  
53  
54  
55  
56  
57  
58  
59  
60  
20  
21  
22  
23  
24  
25  
26  
27  
28  
29  
30  
31  
32  
33  
34  
35  
36  
37  
38  
39  
40  
41  
42  
43  
44  
45  
46  
47  
48  
49  
50  
51  
52  
53  
54  
55  
56  
57  
58  
59  
60  
studies have investigated the potential relationship between CBT and the change of  
inflammatory biomarkers in individuals of depression. And the results are inconsistent  
among studies. The current study aims to provide a comprehensive, systematic review of  
the association between CBT and changes of peripheral inflammation of individuals with  
depression, and clarify the alterations of inflammatory cytokines pre- and post- CBT  
treatment by meta-analysis. anti-inflammatory

26 **26 Methods and analysis:** This study will be conducted in accordance with the *Preferred*  
27  
28  
29  
30  
31  
32  
33  
34  
35  
36  
37  
38  
39  
40  
41  
42  
43  
44  
45  
46  
47  
48  
49  
50  
51  
52  
53  
54  
55  
56  
57  
58  
59  
60  
26  
27  
28  
29  
30  
31  
32  
33  
34  
35  
36  
37  
38  
39  
40  
41  
42  
43  
44  
45  
46  
47  
48  
49  
50  
51  
52  
53  
54  
55  
56  
57  
58  
59  
60  
*Reporting Items for Systematic Reviews and Meta-Analyses* (PRISMA) guidelines. A  
systematic search of predetermined terms will be conducted with electronic databases of  
CENTRAL, MEDLINE, EMBASE, and PsycINFO from inception to July 2021. Database  
searches will be supplemented by expert contact, reference and citation checking, and grey  
literature. Primary outcomes of interest will be validated measures for levels of  
inflammatory cytokines pre- and post- CBT treatment in individuals with depression.  
Hedges' g will be used to represent the effect size (ES).

34 **34 Systematic review registration:** The protocol of current meta-analysis has been registered  
35  
36  
37  
38  
39  
40  
41  
42  
43  
44  
45  
46  
47  
48  
49  
50  
51  
52  
53  
54  
55  
56  
57  
58  
59  
60  
34  
35  
36  
37  
38  
39  
40  
41  
42  
43  
44  
45  
46  
47  
48  
49  
50  
51  
52  
53  
54  
55  
56  
57  
58  
59  
60  
at the Open Science Framework [<https://doi.org/10.17605/osf.io/tr9yh>].

36 **36 Ethics and Dissemination:** Formal ethical approval is not required by the National Ethical  
37  
38  
39  
40  
41  
42  
43  
44  
45  
46  
47  
48  
49  
50  
51  
52  
53  
54  
55  
56  
57  
58  
59  
60  
36  
37  
38  
39  
40  
41  
42  
43  
44  
45  
46  
47  
48  
49  
50  
51  
52  
53  
54  
55  
56  
57  
58  
59  
60  
Review Board in China as primary data will not be collected. The results alterations of  
peripheral inflammatory cytokines pre- and post- CBT treatment in individuals with



1  
2  
3 39 depression will be disseminated through a peer-reviewed publication and inform the most  
4  
5 40 up-to-date evidence of the roles of CBT treatment for depression.  
6  
7  
8 41

9  
10 42 **Keywords:** Depression; Cognitive Behavior Therapy; Inflammation; Cytokines; C-  
11  
12 43 reactive protein  
13  
14  
15 44

## 16 17 18 45 **Article Summary**

### 19 20 46 *Strengths and limitations of this study*

- 21  
22  
23 47 • This will be the first meta-analysis exploring the association between CBT and changes  
24  
25 48 of peripheral inflammation of individuals with depression.  
26  
27  
28 49 • The results could provide the most up-to-date evidence to assist in shared decision  
29  
30 50 making between patients, caregivers, and clinicians in treating the individuals with  
31  
32 51 depression by using CBT.  
33  
34  
35 52 • An insufficient number of original researches is a possible limitation.  
36  
37 53 • Potential high heterogeneity may cause selection bias and also decrease the reliability  
38  
39 54 of our results.  
40  
41  
42 55

## 56 **Introduction**

57 Depression is a severe and the most prevalent form of mental illness that characterized by  
58 neurocognitive deficits and disability <sup>1</sup>. The disorder manifests in millions of individuals  
59 worldwide, and is a global health priority. The exploration of underlying mechanisms of  
60 depression are increasing over the past decades, none of them could clearly clarify the  
61 potential triggers of depression <sup>2</sup>. In recent years, the inflammatory processes are  
62 considered to be important contributors to depression. A systematic review and meta-  
63 analysis confirmed that a high proportion of depressed individuals showed signs of  
64 inflammation<sup>3</sup>. The potential bidirectional relationship of depression and inflammation  
65 were also clarified <sup>4</sup>. For instance, early infection and autoimmune diseases are highly  
66 associated with high risk of depressive disorders in adulthood <sup>5</sup>; evidence from preclinical  
67 and clinical researches reached a consistency that the concentrations of peripheral pro-  
68 inflammatory cytokines significantly increase in individuals or animal models of  
69 depression <sup>6</sup>. The inflammatory cytokines are mediators of environmental and genetic  
70 factors that may contribute to the development of depression from a biological perspective<sup>7</sup>.  
71 A previous study suggested that inflammation may be involved in some certain medical  
72 conditions, and it may activate the pathogenesis of depression by interfering with the  
73 monoamine, glutamate, and neurotrophic system <sup>8</sup>. Dowlat et al. 's study reported that  
74 major depression leads to immune dysregulation and activation of the inflammatory  
75 response system <sup>9</sup>. In addition, a growing body of evidence indicated that inflammation is  
76 thought to be an active process. The inflammatory process can affect multiple aspects of  
77 central nervous system function, and leads to behavioral changes in individuals with  
78 depression <sup>10</sup>. The results of several meta-analyses have proved that depression is related

1  
2  
3 79 to chronic low-grade inflammation. It is manifested by higher concentrations of peripheral  
4  
5 80 C-reactive protein (CRP), interleukin-6 (IL-6), and tumor necrosis factor- $\alpha$  (TNF- $\alpha$ ),  
6  
7  
8 81 compared with healthy controls<sup>11 12</sup>. Above findings have facilitated the development of  
9  
10 82 the inflammatory hypothesis of depression, and have also predicted that inflammation  
11  
12 83 plays a role in the formation, progression and perpetuation of depression.<sup>13 14</sup>. Cognitive  
13  
14 84 behavior therapy (CBT) is becoming the most commonly implemented and standard  
15  
16 85 treatment for depression<sup>15</sup>. Briefly, CBT is based on the premise that false beliefs and  
17  
18 86 negative thoughts are the main causes of depression. The individuals develop strategies for  
19  
20 87 managing and preventing depressive symptoms by monitoring mood symptoms and  
21  
22 88 utilizing a repertoire of coping skills to manage stress in CBT<sup>16</sup>. A meta-analysis found  
23  
24 89 that there is no difference in treatment effects of CBT and second-generation  
25  
26 90 antidepressants, either alone or in combination<sup>17</sup>. Recent published literatures illustrated  
27  
28 91 that similar with antidepressant treatment, CBT may also contribute to reduction of chronic  
29  
30 92 low-grade peripheral inflammation<sup>18</sup>. However, the underlying biological processes of the  
31  
32 93 CBT effects on depression are still very limited.

33  
34  
35  
36  
37  
38 94 To date, only a few numbers of studies have investigated the potentially anti-inflammatory  
39  
40 95 effects of CBT for depression. Results are inconsistent among studies. For example, some  
41  
42 96 researches pointed out that peripheral IL-6 was decreased after CBT, while no significant  
43  
44 97 changes were founded in other studies<sup>19</sup>. Keri et al. (2014) reported that in adults with a  
45  
46 98 first episode of depression, 16 weeks of CBT alone was associated with a reduction in  
47  
48 99 TLR-4 signaling, but no change in TLR-2 signaling, IL-6, or CRP levels. This study  
49  
50 100 suggested that it took longer time or other mechanisms for them to normalize<sup>20</sup>.  
51  
52 101 Additionally, whether the alterations of inflammatory cytokines associated with  
53  
54  
55  
56  
57  
58  
59  
60

1  
2  
3 102 improvements in depression after CBT treatment is also not well established. So far it is  
4  
5 103 worthy to conduct a systematic review and meta-analysis to summarize the most updated  
6  
7  
8 104 research results for the role of CBT treatment in inflammation of depression.  
9  
10  
11 105

## 12 13 14 106 **Aims and Objectives**

15  
16  
17 107 The current study aims to provide a comprehensive, systematic review of the  
18  
19 108 association between CBT and inflammation of individuals with depression, and clarify the  
20  
21 109 alterations of inflammatory cytokines pre- and post- CBT treatment by meta-analysis.  
22  
23  
24 110 From the previous evidence, we hypothesized that some inflammatory cytokines, such as  
25  
26 111 CRP, IL-6, TNF- $\alpha$ , may decrease after the CBT intervention.  
27  
28  
29 112

## 30 31 32 113 **Methods**

### 33 34 35 114 *Search Strategy*

36  
37  
38 115 The systematic review and meta-analysis will be conducted and reported in accordance  
39  
40 116 with the *Preferred Reporting Items for Systematic Reviews and Meta-Analyses (PRISMA)*  
41  
42 117 statement<sup>21</sup>. **Figure 1** summarizes the study selection as a PRISMA flowchart. A  
43  
44  
45 118 systematic search of predetermined terms will be conducted with electronic databases of  
46  
47 119 CENTRAL, MEDLINE, EMBASE, and PsycINFO from inception to July 2021. The  
48  
49 120 keywords of our search strategy will be the key terms mapped to subject headings for (i)  
50  
51 121 depression (major depressive disorder, depression, mood disorder, dysthymic disorder);  
52  
53  
54 122 (ii) CBT (psychotherapy, cognitive therapy, cognitive behavioral therapy); (iii)

1  
2  
3 123 inflammatory cytokines (cytokine, interleukin, chemokine, interferons, tumor necrosis  
4  
5 124 factor, as well as the specific inflammatory biomarkers). The search strategy of PubMed is  
6  
7  
8 125 shown in **Table 1**.

9  
10  
11 126 *Selection Criteria*

12  
13 127 The studies conducting the within-group comparisons of the peripheral levels of  
14  
15 128 cytokines and chemokines in participants with depression at baseline and after CBT will  
16  
17  
18 129 be included in the current meta-analysis. Study eligibility for the inclusion criteria will be  
19  
20 130 assessed by the approach of Population, Intervention, Comparison, Outcome and Study  
21  
22 131 Design (PICOS). Moreover, according to the quality assessment recommendation of  
23  
24 132 Cochrane Collaboration, we will use Newcastle-Ottawa Scale (NOS) to evaluate the  
25  
26 133 quality of the included literatures<sup>22</sup>. Population: adult subjects ( $\geq 18$  years old) meeting the  
27  
28 134 major depression diagnoses by the Diagnostic and Statistical Manual of Mental Disorders  
29  
30 135 (DSM; no restrictions on editions) or International Classification of Diseases and Related  
31  
32 136 Health Problems (ICD) criteria; Intervention and Comparison: assessed the results of  
33  
34 137 peripheral inflammatory cytokines (e.g., IL-6, CRP or IL-10) before and after CBT.  
35  
36 138 Outcome: reported mean or median resting levels of inflammatory cytokines in saliva,  
37  
38 139 blood, or urine was reported before and at least once after starting CBT, or the effect size  
39  
40 140 (ES) could be calculated from the reported results. Study Design: random controlled trial  
41  
42 141 (RCT), open-label study, or longitudinal study with pre-test-post-test design. Exclusion  
43  
44 142 criteria of the studies will meet if they (1) did not focus on evaluating inflammatory  
45  
46 143 cytokines levels on depression; (2) only reported stimulated levels of cytokines; (3) were  
47  
48 144 repetitive publications from the same datasets by the same or different authors; (4) included  
49  
50 145 participants who have been receiving pharmacological treatment in the past one month.  
51  
52  
53  
54  
55  
56  
57  
58  
59  
60

### 146 *Outcome Measures and Data Extraction*

147 The outcome for this meta-analysis will be the changes of inflammatory cytokines pre-  
148 and post- CBT treatment in individuals with depression, which were measured by the  
149 standard mean differences (SMDs) their concentrations. Paired investigators (Jiatong Xu  
150 and Haijing Ma) will independently select the studies, reviewed the main reports and  
151 supplementary materials, extracted the relevant information. All reference lists of the  
152 retrieved articles will be reviewed to identify the potential studies. The following  
153 information will be extracted from each study: first author, publication year, study design,  
154 country, geographic location, age, sex, intervention, duration of intervention, whether it is  
155 a major depressive episode (MDE), inflammatory biomarkers measured, type of sample  
156 specimen required for test, sample detection method, sample size, the mean levels of  
157 subjects' peripheral inflammatory cytokines and standard deviations (SDs) before and after  
158 CBT treatment.

### 159 *Statistical analysis*

160 Only the inflammatory cytokines with sufficient numbers of studies ( $\geq 3$ ) will be  
161 performed the meta-analysis. Analyses will be performed for pre- and post-treatment of  
162 CBT. The main analysis will be conducted with a random effects model. Forest plots will  
163 be used to estimate the alteration of the levels of inflammatory cytokines pre- and post-  
164 treatment CBT, which will be evaluated by SMD with a 95% confidence interval (CI). The  
165 ES is represented as Hedges'  $g$  in order to adjusted for a potential bias wo overestimate the  
166 ES in small samples. According to the statistical power analysis for the behavioral sciences  
167 (2nd edition), the ES is judged using the values of 0.2, 0.5, and 0.8 for small, medium and  
168 large (Cohen, 1988). In addition, we will conduct Bonferroni adjustment for multiple

1  
2  
3 169 testing in meta-analysis, which means we will produce a rejection p-value of 0.05 divided  
4  
5 170 by the total number of outcomes<sup>23</sup>. The heterogeneity across the studies will be evaluated  
6  
7 171 by chi-square statistics and I-Squared ( $I^2$ ) test. A value of  $P < 0.10$  or  $I^2 > 50\%$  indicated that  
8  
9 172 the heterogeneity of effect estimates within each group of studies was statistically  
10  
11 173 significant<sup>24</sup>, and it also shows that the percentage of the variability in effect estimates  
12  
13 174 owes to heterogeneity rather than chance. Furtherly, the subgroup analysis and meta-  
14  
15 175 regression will also be performed to investigate the source of the heterogeneity, and the  
16  
17 176 potential influence of included characteristics of the studies on the pooled effect size.  
18  
19 177 Sensitivity analysis was performed to strengthen the results and investigate whether any  
20  
21 178 single study would have an effect on the heterogeneity of total measurements in each meta-  
22  
23 179 analysis. Additionally, the positive and negative results may not be equally likely to get  
24  
25 180 published, thus the funnel plot with Begg's test and Egger's test will be used for testing the  
26  
27 181 publication bias. If publication bias will be found, then the trim and fill method would be  
28  
29 182 used to both identify and correct the asymmetry of funnel plot. All two-tailed  $p$ -values  $<$   
30  
31 183 0.05 will be defined as statistical significance. All the data analyses will be conducted using  
32  
33 184 Stata (version 15.0, Stata Corp LP, College Station, TX, USA).

#### 34 35 36 37 38 39 40 41 185 *Patient and public involvement*

42  
43 186 Patients were not involved in the development of this systematic review protocol. The  
44  
45 187 data for this systematic review will be collected from previously published studies.

#### 46 47 48 49 188 *Ethics and Dissemination*

50  
51 189 Formal ethical approval is not required, as primary data will not be collected with the  
52  
53 190 systematic review and meta-analysis. Data from previously published studies will be  
54  
55 191 retrieved and analyzed. This study including protocol development will run from October

1  
2  
3 192 2020 to October 2021. The results will be disseminated through a peer-reviewed  
4  
5 193 publication and inform the most up-to-date evidence of the roles of CBT treatment for  
6  
7 194 depression.  
8  
9

10  
11 195

## 12 13 14 196 **Discussion**

### 15 16 17 197 *Presentation of results and reporting*

18  
19 198 Our current systematic review and meta-analysis will provide comprehensive evidence  
20  
21 199 for the association between CBT and inflammation of individuals with depression. We will  
22  
23 200 use the PRISMA guidelines and checklist in the publication process. The quantitative data  
24  
25 201 will be summarized and presented in tables, forest plots, and charts. The alterations of  
26  
27 202 inflammatory cytokines pre- and post- CBT treatment in individuals with depression will  
28  
29 203 be presented.  
30  
31  
32

### 33 204 *Potential resources of limitations*

34  
35  
36 205 The current study is anticipated to have some limitations. Firstly, we might not find a  
37  
38 206 sufficient number of original researches to perform the analyses. Secondly, the potential  
39  
40 207 high heterogeneity between studies in the exposure of interest and restriction to studies in  
41  
42 208 English language will lead to selection bias and also decrease the reliability of our results.  
43  
44

45  
46 209 To the best of our knowledge, this will be the first meta-analysis exploring the  
47  
48 210 association between CBT and peripheral inflammation of individuals with depression.  
49  
50 211 From our findings herein, we can provide the most up-to-date evidence to assist in shared  
51  
52 212 decision making between patients, caregivers, and clinicians in treating the individuals with  
53  
54 213 depression by using CBT and provide a foundation for future studies in this area.  
55  
56  
57



1  
2  
3 214 **Contributorship statement**  
4

5 215 Cao B, Xu JT and Ma HJ conceived the study and developed the search strategy. Cao  
6  
7 216 B drafted the protocol and tested the search strategies in consultation with a librarian. Li  
8  
9 217 RN, Ding L, Liu J and Xue J provided advice on the protocol. All authors critically revised  
10  
11 218 the protocol for methodological and intellectual content and have read and approved the  
12  
13 219 final manuscript.  
14  
15  
16

17 220

18  
19  
20 221 **Funding**  
21

22 222 This research work is supported by funding from Southwest University (SWU019039),  
23  
24 223 The Science and Technology Support Program of Guizhou Science and Technology  
25  
26 224 Department [grant numbers (2020) 4Y183]; The Science and Technology Support Program  
27  
28 225 of Zunyi Science and Technology Bureau [grant numbers (2020)22];. The funding bodies  
29  
30 226 had no part in either the study design, conduct, analysis or interpretation of this study.  
31  
32  
33

34 227 **Competing interests**  
35

36 228 None declared.  
37  
38

39 229 **Patient consent for publication**  
40

41 230 Not required.  
42  
43  
44

45 231 **Data statement**  
46

47 232 No applicable.  
48  
49  
50  
51  
52  
53  
54  
55  
56  
57

233 **References**

- 234 1. Ang YS, Frontero N, Belleau E, et al. Disentangling vulnerability, state and trait features of  
235 neurocognitive impairments in depression. *Brain* 2020 doi: 10.1093/brain/awaa314  
236 [published Online First: 2020/11/12]
- 237 2. McIntosh AM, Hall LS, Zeng Y, et al. Genetic and Environmental Risk for Chronic Pain and the  
238 Contribution of Risk Variants for Major Depressive Disorder: A Family-Based Mixed-  
239 Model Analysis. *PLoS Med* 2016;13(8):e1002090. doi: 10.1371/journal.pmed.1002090  
240 [published Online First: 2016/08/17]
- 241 3. Osimo EF, Baxter LJ, Lewis G, et al. Prevalence of low-grade inflammation in depression: a  
242 systematic review and meta-analysis of CRP levels. *Psychological medicine*  
243 2019;49(12):1958-70. doi: 10.1017/S0033291719001454 [published Online First:  
244 2019/07/02]
- 245 4. Beurel E, Toups M, Nemeroff CB. The Bidirectional Relationship of Depression and  
246 Inflammation: Double Trouble. *Neuron* 2020;107(2):234-56. doi:  
247 10.1016/j.neuron.2020.06.002 [published Online First: 2020/06/20]
- 248 5. Benros ME, Waltoft BL, Nordentoft M, et al. Autoimmune diseases and severe infections as  
249 risk factors for mood disorders: a nationwide study. *JAMA Psychiatry* 2013;70(8):812-20.  
250 doi: 10.1001/jamapsychiatry.2013.1111 [published Online First: 2013/06/14]
- 251 6. Kim YK, Na KS, Myint AM, et al. The role of pro-inflammatory cytokines in neuroinflammation,  
252 neurogenesis and the neuroendocrine system in major depression. *Progress in neuro-*  
253 *psychopharmacology & biological psychiatry* 2016;64:277-84. doi:  
254 10.1016/j.pnpbp.2015.06.008 [published Online First: 2015/06/27]
- 255 7. Song C, Wang H. Cytokines mediated inflammation and decreased neurogenesis in animal  
256 models of depression. *Progress in neuro-psychopharmacology & biological psychiatry*  
257 2011;35(3):760-8. doi: 10.1016/j.pnpbp.2010.06.020 [published Online First:  
258 2010/07/06]
- 259 8. McNally L, Bhagwagar Z, Hannestad J. Inflammation, glutamate, and glia in depression: a  
260 literature review. *CNS Spectr* 2008;13(6):501-10. doi: 10.1017/s1092852900016734  
261 [published Online First: 2008/06/24]
- 262 9. Dowlati Y, Herrmann N, Swardfager W, et al. A meta-analysis of cytokines in major  
263 depression. *Biol Psychiatry* 2010;67(5):446-57. doi: 10.1016/j.biopsych.2009.09.033  
264 [published Online First: 2009/12/18]
- 265 10. Irwin MR, Miller AH. Depressive disorders and immunity: 20 years of progress and discovery.  
266 *Brain Behav Immun* 2007;21(4):374-83. doi: 10.1016/j.bbi.2007.01.010 [published  
267 Online First: 2007/03/16]
- 268 11. Kohler CA, Freitas TH, Stubbs B, et al. Peripheral Alterations in Cytokine and Chemokine  
269 Levels After Antidepressant Drug Treatment for Major Depressive Disorder: Systematic  
270 Review and Meta-Analysis. *Molecular neurobiology* 2018;55(5):4195-206. doi:  
271 10.1007/s12035-017-0632-1 [published Online First: 2017/06/15]
- 272 12. Wiedlocha M, Marcinowicz P, Krupa R, et al. Effect of antidepressant treatment on  
273 peripheral inflammation markers - A meta-analysis. *Progress in neuro-*  
274 *psychopharmacology & biological psychiatry* 2018;80(Pt C):217-26. doi:  
275 10.1016/j.pnpbp.2017.04.026 [published Online First: 2017/04/27]
- 276 13. Kohler-Forsberg O, C NL, Hjorthoj C, et al. Efficacy of anti-inflammatory treatment on major  
277 depressive disorder or depressive symptoms: meta-analysis of clinical trials. *Acta*

- 1  
2  
3 278 *psychiatrica Scandinavica* 2019;139(5):404-19. doi: 10.1111/acps.13016 [published  
4 279 Online First: 2019/03/06]  
5 280 14. Husain MI, Strawbridge R, Stokes PR, et al. Anti-inflammatory treatments for mood  
6 281 disorders: Systematic review and meta-analysis. *Journal of psychopharmacology*  
7 282 (Oxford, England) 2017;31(9):1137-48. doi: 10.1177/0269881117725711 [published  
8 283 Online First: 2017/09/01]  
9 284 15. Lopez MA, Basco MA. Effectiveness of cognitive behavioral therapy in public mental health:  
10 285 comparison to treatment as usual for treatment-resistant depression. *Adm Policy Ment*  
11 286 *Health* 2015;42(1):87-98. doi: 10.1007/s10488-014-0546-4 [published Online First:  
12 287 2014/04/03]  
13 288 16. Pearlstein JG, Staudenmaier PJ, West AE, et al. Immune response to stress induction as a  
14 289 predictor of cognitive-behavioral therapy outcomes in adolescent mood disorders: A  
15 290 pilot study. *J Psychiatr Res* 2020;120:56-63. doi: 10.1016/j.jpsychires.2019.10.012  
16 291 [published Online First: 2019/10/22]  
17 292 17. Amick HR, Gartlehner G, Gaynes BN, et al. Comparative benefits and harms of second  
18 293 generation antidepressants and cognitive behavioral therapies in initial treatment of  
19 294 major depressive disorder: systematic review and meta-analysis. *BMJ* 2015;351:h6019.  
20 295 doi: 10.1136/bmj.h6019 [published Online First: 2015/12/10]  
21 296 18. Lopresti AL. Cognitive behaviour therapy and inflammation: A systematic review of its  
22 297 relationship and the potential implications for the treatment of depression. *Aust N Z J*  
23 298 *Psychiatry* 2017;51(6):565-82. doi: 10.1177/0004867417701996 [published Online First:  
24 299 2017/04/07]  
25 300 19. Felger JC, Lotrich FE. Inflammatory cytokines in depression: neurobiological mechanisms and  
26 301 therapeutic implications. *Neuroscience* 2013;246:199-229. doi:  
27 302 10.1016/j.neuroscience.2013.04.060 [published Online First: 2013/05/07]  
28 303 20. Keri S, Szabo C, Kelemen O. Expression of Toll-Like Receptors in peripheral blood  
29 304 mononuclear cells and response to cognitive-behavioral therapy in major depressive  
30 305 disorder. *Brain Behav Immun* 2014;40:235-43. doi: 10.1016/j.bbi.2014.03.020  
31 306 [published Online First: 2014/04/15]  
32 307 21. Moher D, Liberati A, Tetzlaff J, et al. Preferred reporting items for systematic reviews and  
33 308 meta-analyses: the PRISMA statement. *PLoS Med* 2009;6(7):e1000097. doi:  
34 309 10.1371/journal.pmed.1000097  
35 310 22. Lo CK, Mertz D, Loeb M. Newcastle-Ottawa Scale: comparing reviewers' to authors'  
36 311 assessments. *BMC Med Res Methodol* 2014;14:45. doi: 10.1186/1471-2288-14-45  
37 312 23. Ng A, Tam WW, Zhang MW, et al. IL-1beta, IL-6, TNF- alpha and CRP in Elderly Patients with  
38 313 Depression or Alzheimer's disease: Systematic Review and Meta-Analysis. *Sci Rep*  
39 314 2018;8(1):12050. doi: 10.1038/s41598-018-30487-6 [published Online First:  
40 315 2018/08/15]  
41 316 24. Cao B, Wang DF, Xu MY, et al. Lower folate levels in schizophrenia: A meta-analysis.  
42 317 *Psychiatry Res* 2016;245:1-7. doi: 10.1016/j.psychres.2016.03.003

318

1  
2  
3  
4  
5  
6  
7  
8  
9  
10  
11  
12  
13  
14  
15  
16  
17  
18  
19  
20  
21  
22  
23  
24  
25  
26  
27  
28  
29  
30  
31  
32  
33  
34  
35  
36  
37  
38  
39  
40  
41  
42  
43  
44  
45  
46  
47  
48  
49  
50  
51  
52  
53  
54  
55  
56  
57  
58  
59  
60

320 **Figure Legend**

321 **Figure 1.** PRISMA flow diagram of study selection process.

322

For peer review only

323

324

**Table 1. Search strategy for PubMed**

| Search number | Query                                                                                                                                                                                                                                                                                                                                                                                                                                                                                                                                                                                                                                                                                                                                                                                                                                                                                                                                                                                                                                                                                                                                                                                                         |
|---------------|---------------------------------------------------------------------------------------------------------------------------------------------------------------------------------------------------------------------------------------------------------------------------------------------------------------------------------------------------------------------------------------------------------------------------------------------------------------------------------------------------------------------------------------------------------------------------------------------------------------------------------------------------------------------------------------------------------------------------------------------------------------------------------------------------------------------------------------------------------------------------------------------------------------------------------------------------------------------------------------------------------------------------------------------------------------------------------------------------------------------------------------------------------------------------------------------------------------|
| #1            | "major depression"[Title/Abstract] OR "major depressive disorder"[Title/Abstract] OR "depressive symptom*"[Title/Abstract] OR "symptom, depressive"[Title/Abstract] OR "depress*" [Title/Abstract] OR "dysphor*" [Title/Abstract] OR "dysthym*"[Title/Abstract] OR "adjustment disorder*"[Title/Abstract] OR "mood disorder*"[Title/Abstract] OR "affective disorder"[Title/Abstract] OR "affective disorders"[Title/Abstract] OR "emotional depression*"[Title/Abstract]                                                                                                                                                                                                                                                                                                                                                                                                                                                                                                                                                                                                                                                                                                                                     |
| #2            | "Depression"[Mesh] OR "Depressive Disorder"[Mesh] OR "Depressive Disorder, Treatment-Resistant"[Mesh] OR "Depressive Disorder, Major"[Mesh]                                                                                                                                                                                                                                                                                                                                                                                                                                                                                                                                                                                                                                                                                                                                                                                                                                                                                                                                                                                                                                                                   |
| #3            | #1 OR #2                                                                                                                                                                                                                                                                                                                                                                                                                                                                                                                                                                                                                                                                                                                                                                                                                                                                                                                                                                                                                                                                                                                                                                                                      |
| #4            | "Cognitive Behavioral Therapy"[Mesh]                                                                                                                                                                                                                                                                                                                                                                                                                                                                                                                                                                                                                                                                                                                                                                                                                                                                                                                                                                                                                                                                                                                                                                          |
| #5            | "behavioral therapies, cognitive"[Title/Abstract] OR "behavioral therapy, cognitive"[Title/Abstract] OR "cognitive behavioral Therap*"[Title/Abstract] OR "cognitive behavior therap*"[Title/Abstract] OR "cognitive psychotherap*"[Title/Abstract] OR "behavior modification" [Title/Abstract] OR "behavior therap*"[Title/Abstract] OR "cognitive therap*" [Title/Abstract] OR "psychotherapy*" [Title/Abstract]                                                                                                                                                                                                                                                                                                                                                                                                                                                                                                                                                                                                                                                                                                                                                                                            |
| #6            | #4 OR #5                                                                                                                                                                                                                                                                                                                                                                                                                                                                                                                                                                                                                                                                                                                                                                                                                                                                                                                                                                                                                                                                                                                                                                                                      |
| #7            | "Cytokines"[Mesh] OR "Chemokines"[Mesh] OR "Interleukins"[Mesh]                                                                                                                                                                                                                                                                                                                                                                                                                                                                                                                                                                                                                                                                                                                                                                                                                                                                                                                                                                                                                                                                                                                                               |
| #8            | "cytokine*" [Title/Abstract] OR "interleukin*" [Title/Abstract] OR "chemokine*" [Title/Abstract] OR "tumor necrosis factor"[Title/Abstract] OR "interferon"[Title/Abstract] OR "C-reactive protein"[Title/Abstract] OR "IFN"[Title/Abstract] OR "TNF"[Title/Abstract] OR "CRP" [Title/Abstract] OR "IL-1 $\beta$ "[Title/Abstract] OR " IL-2"[Title/Abstract] OR "IL-4"[Title/Abstract] OR "IL-6"[Title/Abstract] OR "IL-8"[Title/Abstract] OR "IL-10"[Title/Abstract] OR "IL-12"[Title/Abstract] OR "IL-18"[Title/Abstract] OR "TGF- $\beta$ "[Title/Abstract] OR "IFN- $\gamma$ "[Title/Abstract]) OR ("cytokine*" [Title/Abstract] OR "interleukin*" [Title/Abstract] OR "chemokine*" [Title/Abstract] OR "tumor necrosis factor"[Title/Abstract] OR "interferon"[Title/Abstract] OR "C-reactive protein"[Title/Abstract] OR "IFN"[Title/Abstract] OR "TNF"[Title/Abstract] OR "CRP" [Title/Abstract] OR "IL-1 $\beta$ "[Title/Abstract] OR " IL-2"[Title/Abstract] OR "IL-4"[Title/Abstract] OR "IL-6"[Title/Abstract] OR "IL-8"[Title/Abstract] OR "IL-10"[Title/Abstract] OR "IL-12"[Title/Abstract] OR "IL-18"[Title/Abstract] OR "TGF- $\beta$ "[Title/Abstract] OR "IFN- $\gamma$ "[Title/Abstract]) |
| #9            | #7 OR #8                                                                                                                                                                                                                                                                                                                                                                                                                                                                                                                                                                                                                                                                                                                                                                                                                                                                                                                                                                                                                                                                                                                                                                                                      |
| #10           | #3 AND #6 AND #9                                                                                                                                                                                                                                                                                                                                                                                                                                                                                                                                                                                                                                                                                                                                                                                                                                                                                                                                                                                                                                                                                                                                                                                              |

325

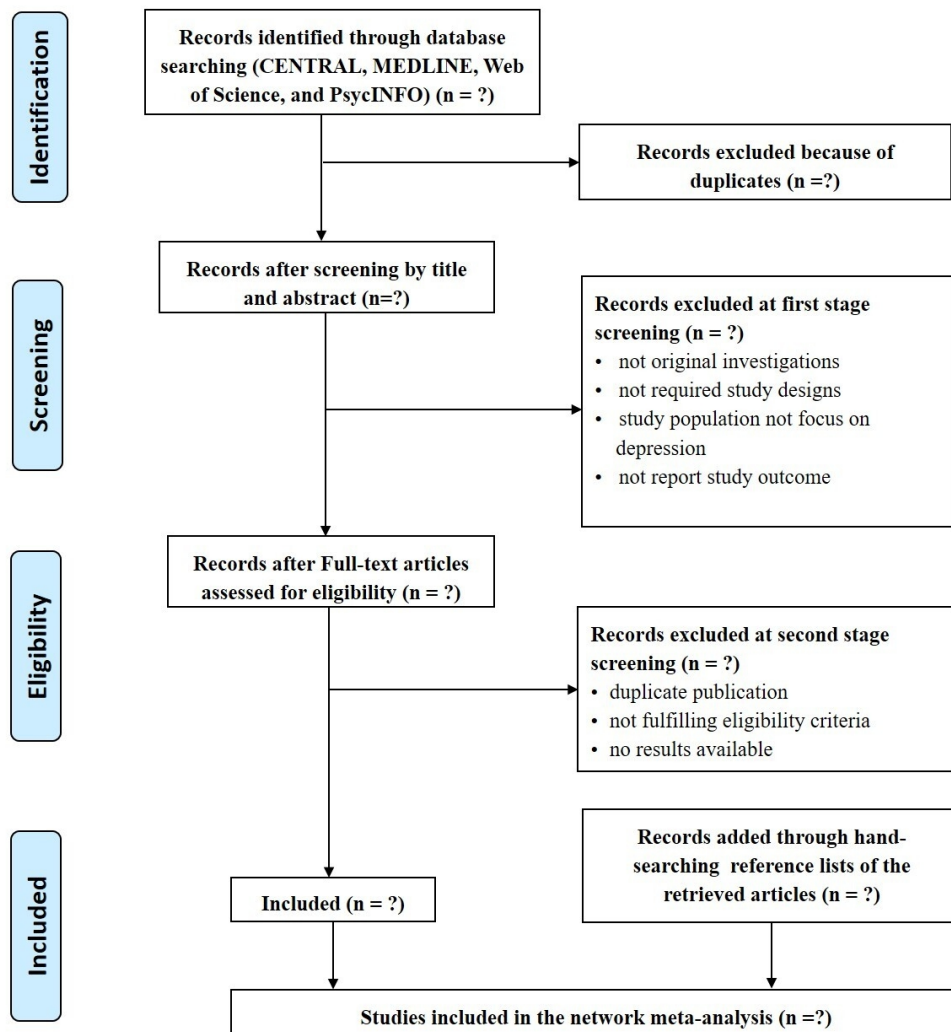

Figure 1. PRISMA flow diagram of study selection process.

100x106mm (300 x 300 DPI)

# Reporting checklist for protocol of a systematic review.

Based on the PRISMA-P guidelines.

## Instructions to authors

Complete this checklist by entering the page numbers from your manuscript where readers will find each of the items listed below.

Your article may not currently address all the items on the checklist. Please modify your text to include the missing information. If you are certain that an item does not apply, please write "n/a" and provide a short explanation.

Upload your completed checklist as an extra file when you submit to a journal.

In your methods section, say that you used the PRISMA-Preporting guidelines, and cite them as:

Moher D, Shamseer L, Clarke M, Ghersi D, Liberati A, Petticrew M, Shekelle P, Stewart LA. Preferred Reporting Items for Systematic Review and Meta-Analysis Protocols (PRISMA-P) 2015 statement. *Syst Rev.* 2015;4(1):1.

| Reporting Item      |                     |                                                                                                                                           | Page Number |
|---------------------|---------------------|-------------------------------------------------------------------------------------------------------------------------------------------|-------------|
| <b>Title</b>        |                     |                                                                                                                                           |             |
| Identification      | <a href="#">#1a</a> | Identify the report as a protocol of a systematic review                                                                                  | 1           |
| Update              | <a href="#">#1b</a> | If the protocol is for an update of a previous systematic review, identify as such                                                        | NA          |
| <b>Registration</b> |                     |                                                                                                                                           |             |
|                     | <a href="#">#2</a>  | If registered, provide the name of the registry (such as PROSPERO) and registration number                                                | 2           |
| <b>Authors</b>      |                     |                                                                                                                                           |             |
| Contact             | <a href="#">#3a</a> | Provide name, institutional affiliation, e-mail address of all protocol authors; provide physical mailing address of corresponding author | 1           |
| Contribution        | <a href="#">#3b</a> | Describe contributions of protocol authors and identify the guarantor of the review                                                       | 10          |
| <b>Amendments</b>   |                     |                                                                                                                                           |             |



|    |                      |                      |                                                                           |     |
|----|----------------------|----------------------|---------------------------------------------------------------------------|-----|
| 1  |                      | <a href="#">#4</a>   | If the protocol represents an amendment of a previously completed or      | NA  |
| 2  |                      |                      | published protocol, identify as such and list changes; otherwise, state   |     |
| 3  |                      |                      | plan for documenting important protocol amendments                        |     |
| 4  |                      |                      |                                                                           |     |
| 5  |                      |                      |                                                                           |     |
| 6  | <b>Support</b>       |                      |                                                                           |     |
| 7  |                      |                      |                                                                           |     |
| 8  | Sources              | <a href="#">#5a</a>  | Indicate sources of financial or other support for the review             | 10  |
| 9  |                      |                      |                                                                           |     |
| 10 | Sponsor              | <a href="#">#5b</a>  | Provide name for the review funder and / or sponsor                       | 10  |
| 11 |                      |                      |                                                                           |     |
| 12 | Role of sponsor or   | <a href="#">#5c</a>  | Describe roles of funder(s), sponsor(s), and / or institution(s), if any, | 10  |
| 13 | funder               |                      | in developing the protocol                                                |     |
| 14 |                      |                      |                                                                           |     |
| 15 |                      |                      |                                                                           |     |
| 16 |                      |                      |                                                                           |     |
| 17 | <b>Introduction</b>  |                      |                                                                           |     |
| 18 |                      |                      |                                                                           |     |
| 19 | Rationale            | <a href="#">#6</a>   | Describe the rationale for the review in the context of what is already   | 4-5 |
| 20 |                      |                      | known                                                                     |     |
| 21 |                      |                      |                                                                           |     |
| 22 | Objectives           | <a href="#">#7</a>   | Provide an explicit statement of the question(s) the review will          | 5   |
| 23 |                      |                      | address with reference to participants, interventions, comparators, and   |     |
| 24 |                      |                      | outcomes (PICO)                                                           |     |
| 25 |                      |                      |                                                                           |     |
| 26 |                      |                      |                                                                           |     |
| 27 |                      |                      |                                                                           |     |
| 28 | <b>Methods</b>       |                      |                                                                           |     |
| 29 |                      |                      |                                                                           |     |
| 30 | Eligibility criteria | <a href="#">#8</a>   | Specify the study characteristics (such as PICO, study design, setting,   | 6-7 |
| 31 |                      |                      | time frame) and report characteristics (such as years considered,         |     |
| 32 |                      |                      | language, publication status) to be used as criteria for eligibility for  |     |
| 33 |                      |                      | the review                                                                |     |
| 34 |                      |                      |                                                                           |     |
| 35 | Information sources  | <a href="#">#9</a>   | Describe all intended information sources (such as electronic             | 6-7 |
| 36 |                      |                      | databases, contact with study authors, trial registers or other grey      |     |
| 37 |                      |                      | literature sources) with planned dates of coverage                        |     |
| 38 |                      |                      |                                                                           |     |
| 39 | Search strategy      | <a href="#">#10</a>  | Present draft of search strategy to be used for at least one electronic   | 6-7 |
| 40 |                      |                      | database, including planned limits, such that it could be repeated        |     |
| 41 |                      |                      |                                                                           |     |
| 42 | Study records - data | <a href="#">#11a</a> | Describe the mechanism(s) that will be used to manage records and         | 7   |
| 43 | management           |                      | data throughout the review                                                |     |
| 44 |                      |                      |                                                                           |     |
| 45 | Study records -      | <a href="#">#11b</a> | State the process that will be used for selecting studies (such as two    | 7   |
| 46 | selection process    |                      | independent reviewers) through each phase of the review (that is,         |     |
| 47 |                      |                      | screening, eligibility and inclusion in meta-analysis)                    |     |
| 48 |                      |                      |                                                                           |     |
| 49 | Study records - data | <a href="#">#11c</a> | Describe planned method of extracting data from reports (such as          | 7   |
| 50 | collection process   |                      | piloting forms, done independently, in duplicate), any processes for      |     |
| 51 |                      |                      |                                                                           |     |
| 52 |                      |                      |                                                                           |     |
| 53 |                      |                      |                                                                           |     |
| 54 |                      |                      |                                                                           |     |
| 55 |                      |                      |                                                                           |     |
| 56 |                      |                      |                                                                           |     |
| 57 |                      |                      |                                                                           |     |
| 58 |                      |                      |                                                                           |     |
| 59 |                      |                      |                                                                           |     |
| 60 |                      |                      |                                                                           |     |



|    |                    |                                                                                           |     |
|----|--------------------|-------------------------------------------------------------------------------------------|-----|
|    |                    | obtaining and confirming data from investigators                                          |     |
| 1  |                    |                                                                                           |     |
| 2  |                    |                                                                                           |     |
| 3  | Data items         | <a href="#">#12</a> List and define all variables for which data will be sought (such as  | 7   |
| 4  |                    | PICO items, funding sources), any pre-planned data assumptions and                        |     |
| 5  |                    | simplifications                                                                           |     |
| 6  |                    |                                                                                           |     |
| 7  |                    |                                                                                           |     |
| 8  | Outcomes and       | <a href="#">#13</a> List and define all outcomes for which data will be sought, including | 7   |
| 9  | prioritization     | prioritization of main and additional outcomes, with rationale                            |     |
| 10 |                    |                                                                                           |     |
| 11 | Risk of bias in    | <a href="#">#14</a> Describe anticipated methods for assessing risk of bias of individual | 8   |
| 12 | individual studies | studies, including whether this will be done at the outcome or study                      |     |
| 13 |                    | level, or both; state how this information will be used in data synthesis                 |     |
| 14 |                    |                                                                                           |     |
| 15 |                    |                                                                                           |     |
| 16 |                    |                                                                                           |     |
| 17 | Data synthesis     | <a href="#">#15a</a> Describe criteria under which study data will be quantitatively      | 7-8 |
| 18 |                    | synthesised                                                                               |     |
| 19 |                    |                                                                                           |     |
| 20 |                    |                                                                                           |     |
| 21 | Data synthesis     | <a href="#">#15b</a> If data are appropriate for quantitative synthesis, describe planned | 7-8 |
| 22 |                    | summary measures, methods of handling data and methods of                                 |     |
| 23 |                    | combining data from studies, including any planned exploration of                         |     |
| 24 |                    | consistency (such as I <sup>2</sup> , Kendall's $\tau$ )                                  |     |
| 25 |                    |                                                                                           |     |
| 26 |                    |                                                                                           |     |
| 27 |                    |                                                                                           |     |
| 28 | Data synthesis     | <a href="#">#15c</a> Describe any proposed additional analyses (such as sensitivity or    | 7-8 |
| 29 |                    | subgroup analyses, meta-regression)                                                       |     |
| 30 |                    |                                                                                           |     |
| 31 | Data synthesis     | <a href="#">#15d</a> If quantitative synthesis is not appropriate, describe the type of   | NA  |
| 32 |                    | summary planned                                                                           |     |
| 33 |                    |                                                                                           |     |
| 34 |                    |                                                                                           |     |
| 35 | Meta-bias(es)      | <a href="#">#16</a> Specify any planned assessment of meta-bias(es) (such as publication  | 8   |
| 36 |                    | bias across studies, selective reporting within studies)                                  |     |
| 37 |                    |                                                                                           |     |
| 38 |                    |                                                                                           |     |
| 39 | Confidence in      | <a href="#">#17</a> Describe how the strength of the body of evidence will be assessed    | 8   |
| 40 | cumulative         | (such as GRADE)                                                                           |     |
| 41 | evidence           |                                                                                           |     |
| 42 |                    |                                                                                           |     |
| 43 |                    |                                                                                           |     |

The PRISMA-P checklist is distributed under the terms of the Creative Commons Attribution License CC-BY 4.0. This checklist was completed on 18. December 2020 using <https://www.goodreports.org/>, a tool made by the [EQUATOR Network](#) in collaboration with [Penelope.ai](#)
